# Supplementary material for: The impact of a father's presence during newborn resuscitation: a qualitative interview study with healthcare professionals
Source: PubMed Central journal article supplement — BMJ Open. 2013 Mar 27;3(3):e002547. doi: 10.1136/bmjopen-2013-002547 (PMC3612808; doi:10.1136/bmjopen-2013-002547), 2013-03-27
Supplement: bmjopen-2013-002547.draft_revisions.pdf [file bmjopen-2013-002547.draft_revisions.pdf]

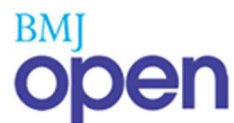

**The impact of a father's presence during newborn resuscitation: a qualitative interview study with health care professionals**

|                                 |                                                                                                                     |
|---------------------------------|---------------------------------------------------------------------------------------------------------------------|
| Journal:                        | <i>BMJ Open</i>                                                                                                     |
| Manuscript ID:                  | bmjopen-2013-002547                                                                                                 |
| Article Type:                   | Research                                                                                                            |
| Date Submitted by the Author:   | 02-Jan-2013                                                                                                         |
| Complete List of Authors:       | Harvey, MerryI; Birmingham City University, Child Health<br>Pattison, Helen; Aston University, Life Health Sciences |
| <b>Primary Subject Heading</b>: | Paediatrics                                                                                                         |
| Secondary Subject Heading:      | Qualitative research, Paediatrics, Obstetrics and gynaecology                                                       |
| Keywords:                       | NEONATOLOGY, Neonatal intensive & critical care < INTENSIVE & CRITICAL CARE, QUALITATIVE RESEARCH                   |
|                                 |                                                                                                                     |

SCHOLARONE™  
Manuscripts

Peer Review Only

1  
2  
3 **The impact of a father's presence during newborn resuscitation: a qualitative**  
4  
5 **interview study with health care professionals**  
6  
7  
8  
9

10  
11  
12 Merryll E Harvey, Helen M Pattison  
13

14  
15  
16  
17  
18 Merryll E Harvey senior academic Faculty of Health, Birmingham City University,  
19  
20 Birmingham B15 3TN Helen M Pattison professor School of Life Health Sciences,  
21  
22 Aston University B4 7ET  
23  
24  
25  
26  
27  
28  
29  
30  
31  
32  
33  
34  
35  
36  
37  
38  
39  
40  
41  
42  
43  
44  
45  
46  
47  
48  
49  
50  
51  
52  
53

54 Correspondence to: Dr Merryll E Harvey [merryl.harvey@bcu.ac.uk](mailto:merryl.harvey@bcu.ac.uk)  
55  
56  
57  
58  
59  
60

## ARTICLE SUMMARY

### Article Focus:

The research question for this study was; 'What are the experiences of health care professionals of the father's presence during newborn resuscitation in the delivery room?' To address this question, the objectives of this phase of the study were:

1. To conduct interviews utilising the critical incident approach with HCPs who had experience of newborn resuscitation when the baby's father was present.
2. To provide an account of the experiences of HCPs of newborn resuscitation when the baby's father was present.

### Key messages:

The key messages and significance of the study are:

1. Whilst the health care professionals were aware of the information and support needs of fathers during newborn resuscitation, they acknowledged that these needs were rarely met.
2. The health care professionals in this study had not received education and training specifically about supporting fathers during newborn resuscitation.
3. The health care professionals in this study did not utilize strategies to support fathers that are recommended when relatives are present during resuscitation events in other critical care settings.

### Strengths and limitations:

This independent study is the first reported exploration of the experiences and perceptions of health care professionals involved in neonatal resuscitation in the delivery room when the baby's father was also present. The critical incident approach proved to be an

1  
2  
3 appropriate way to gain insight to the participants' experiences and the context in which the  
4  
5 resuscitation occurred. Asking participants to focus on the father enabled many of them to  
6  
7 consider the impact of newborn resuscitation on fathers for the first time. Although some  
8  
9 participants chose to describe events that occurred a while ago, they had no difficulty  
10  
11 remembering what happened or their feelings at the time. Whilst some participants found  
12  
13 describing events upsetting; no-one wished to discontinue the interview. Although  
14  
15 undertaken in one setting, the extent to which the findings apply to other health care  
16  
17 professionals encountering newborn resuscitation can be considered.  
18  
19  
20  
21  
22  
23

## 24 **Abstract**

25  
26 **Objective:** To explore the experiences of health care professionals of the father's  
27  
28 presence during newborn resuscitation in the delivery room.  
29

30  
31 **Design:** A descriptive, retrospective design using the critical incident approach.  
32  
33 Tape-recorded semi-structured interviews were undertaken with health care  
34  
35 professionals involved in newborn resuscitation. Participants recalled resuscitation  
36  
37 events when the baby's father was present. They described what happened and how  
38  
39 those present, including the father, responded. They also reflected upon the impact  
40  
41 of the resuscitation and the father's presence on themselves.  
42  
43

44  
45 **Setting:** Participants were staff recruited from a large teaching hospital in the UK.

46  
47 **Participants** A purposive sample of 37 health care professionals including midwives,  
48  
49 obstetricians, anaesthetists, neonatal nurse practitioners, neonatal nurses and  
50  
51 paediatricians.  
52

53  
54 **Results** Participant responses were analysed using thematic analysis. Four themes  
55  
56 were identified: 'whose role?' 'saying and doing' 'teamwork' and 'impact on me'.  
57  
58 Whilst no-one was delegated to support the father during the resuscitation, midwives  
59  
60

1  
2  
3 and anaesthetists most commonly took on this role. Most participants felt the midwife  
4 was the most appropriate person support fathers. All health care professional groups  
5  
6 said they often did not know what to say to fathers during prolonged resuscitation.  
7  
8

9  
10 Teamwork and inter-professional working were felt to be of benefit to all concerned,  
11 including the father. Some paediatricians described their discomfort when fathers  
12 came to the resuscitaire. None of the participants had received education and  
13  
14 training specifically on supporting fathers during newborn resuscitation.  
15  
16  
17

18 **Conclusions** This is the first study to specifically explore the experiences of health  
19 care professionals of the father's presence during newborn resuscitation. The  
20  
21 findings suggest the need for more focused training about supporting fathers. There  
22  
23 is also scope for service providers to consider ways in which fathers can be  
24  
25 supported more readily during newborn resuscitation.  
26  
27  
28  
29  
30  
31  
32  
33  
34  
35  
36  
37  
38  
39  
40  
41  
42  
43  
44  
45  
46  
47  
48  
49  
50  
51  
52  
53  
54  
55  
56  
57  
58  
59  
60

## INTRODUCTION

When a newborn baby requires resuscitation in UK settings, the father will usually be present because most fathers attend the birth of their baby and delivery and resuscitation generally take place in the same room (1,2,3). Whilst some studies have investigated the impact on health care professionals (HCPs) of parental presence during neonatal resuscitation in the neonatal unit (NNU) (4,5); the father's presence during newborn resuscitation in the delivery room has only been reported in terms of the impact on the father (6).

The experiences of HCPs of the presence of a relative during the resuscitation of a family member has been investigated in settings such as adult and paediatric intensive care and accident and emergency (7,8,9). Early 'witnessed resuscitation' (WR) research identified that HCPs had a generally negative view of this experience (10). In addition to the potentially harmful psychological effect and physical risks to the relatives, HCPs felt WR would impinge on themselves and their practice in a

1  
2  
3 negative way (8,11,12). However, despite some initial opposition, most HCPs now  
4  
5 embrace the concept of WR and it has become accepted practice in many Western  
6  
7 countries over the last two decades. This reflects a generally more open and  
8  
9 inclusive approach to health care and recognition of the need to deliver family-  
10  
11 centred care (13,14).  
12

13  
14  
15  
16 The feelings and perceptions of HCPs' experiences of the father's presence during  
17  
18 newborn resuscitation in the delivery room have not previously been investigated.  
19  
20 These phenomena were explored as part of a study of father's experiences of  
21  
22 childbirth and the immediate care of their baby (6). The aim of this part of the wider  
23  
24 study was to gain a broader understanding of fathers' experiences through HCPs'  
25  
26 accounts of episodes of care. Participants also reflected on the ways in which the  
27  
28 father's presence impacted on themselves and their practice. This paper focuses on  
29  
30 the findings pertaining to the experiences of HCPs of the father's presence during  
31  
32 newborn resuscitation.  
33  
34  
35  
36  
37

## 38 **METHOD**

### 39 **Participants**

40  
41  
42  
43 A purposive sample of 37 HCPs including midwives, obstetricians, anaesthetists,  
44  
45 neonatal nurse practitioners, neonatal nurses and paediatricians was recruited from  
46  
47 one large teaching hospital in the UK (Table 1). The only inclusion criterion was that  
48  
49 the HCP had experience of neonatal resuscitation in the delivery room when the  
50  
51 baby's father was present. No exclusion criteria were identified. Participants were  
52  
53  
54  
55  
56  
57  
58  
59  
60

1  
2  
3 recruited using a range of strategies: posters inviting HCPs to take part were  
4 displayed in various locations within the maternity unit and NNU; HCP meetings  
5 were attended to discuss the study and information leaflets were distributed in the  
6 delivery suite and NNU. Some participants also recommended other HCPs. In  
7 accordance with the critical incident approach, recruitment continued until a range of  
8 HCPs who had encountered a variety of experiences was recruited (15).  
9  
10  
11  
12  
13  
14  
15  
16  
17

18 Six HCPs approached about the study decided not to take part (2 midwives and 4  
19 neonatal nurses). Another six said they would participate but staff shortages and  
20 workload issues meant that the interview did not take place (2 midwives, 2 neonatal  
21 nurses, 1 paediatrician and 1 obstetrician). The sample included participants with  
22 diverse clinical backgrounds and experience (16) (Table 1). Detail regarding the  
23 participants' ages has not been included to safeguard their anonymity. The  
24 participants were from a range of ethnic backgrounds corresponding to the main  
25 groups represented in the study site's local population. The relatively high number of  
26 neonatal nurses interviewed is because this part of the study also explored HCPs'  
27 experiences of the father's first visit to his baby on the NNU (not reported here). All  
28 the neonatal nurses who participated in this phase of the study, regularly attended  
29 delivery suite to support other staff during newborn resuscitation.  
30  
31  
32  
33  
34  
35  
36  
37  
38  
39  
40  
41  
42  
43  
44  
45  
46

## 47 **INTERVIEWS**

48  
49  
50 Semi-structured, qualitative interviews were undertaken using the critical incident  
51 approach (17). Participants were asked to select an incident involving newborn  
52 resuscitation in the delivery room when they and the baby's father had been present.  
53  
54  
55  
56  
57  
58  
59  
60



1  
2  
3 They described what happened and how those present, particularly the father,  
4 responded (15,18). The interviewer (MH) used key questions and follow-up  
5 questions to facilitate the description of events and to explore HCP perceptions and  
6 feelings. This flexible approach enabled HCPs to describe what happened and their  
7 feelings in their own words (19,20). In order to ensure a range of scenarios were  
8 explored, participants were then asked to describe a contrasting incident (21,22).  
9  
10 The interviews ranged between 22 and 78 minutes (mean 48 minutes). Participants  
11 were interviewed in a private room within the Hospital. Most of the interviews took  
12 place on weekday afternoons within the HCP's working day. With participant  
13 informed consent, the interviews were tape-recorded to enable verbatim transcription  
14 and data analysis. At the end of the interview, participants were given a debriefing  
15 sheet identifying possible sources of support. In accordance with qualitative  
16 methods; data collection, transcription and data analysis were carried out  
17 concurrently (20,23). The study was approved by the Solihull Local Research Ethics  
18 Committee (05/Q2706/104). University and trust approvals were also obtained. All  
19 participants gave informed consent immediately before the interview.  
20  
21  
22  
23  
24  
25  
26  
27  
28  
29  
30  
31  
32  
33  
34  
35  
36  
37  
38  
39

## 40 ANALYSIS

41  
42  
43  
44  
45 Thematic analysis was undertaken using the software package 'NVivo 7'. The first  
46 transcript was coded into themes. These were organized into themes, each of which  
47 contained a number of related sub-themes. Subsequent transcripts were then  
48 analysed and additional themes or sub-themes were generated when the data  
49 captured something new. 'NVivo' software was used to facilitate the process as it  
50 facilitates the identification of relationships between the themes (24). Data collection  
51  
52  
53  
54  
55  
56  
57  
58  
59  
60

1  
2  
3 continued until no new themes were identified (data saturation) (19,25). The themes  
4  
5 and sub-themes were reviewed and amended until the final framework was agreed  
6  
7 by both authors.  
8  
9

## 10 11 **RESULTS**

12  
13  
14  
15  
16 Analysis of the data generated four themes: 'whose role?' 'saying and doing,'  
17  
18 'teamwork' and 'impact on me' which are described and illustrated with direct  
19  
20 quotations.  
21  
22  
23

### 24 25 **Whose role?**

26  
27  
28  
29 This theme focuses on which HCP supported and communicated with the father  
30  
31 during and after the resuscitation. In the events described no-one exclusively took  
32  
33 on these roles during the incident and no-one was delegated to do so. This was  
34  
35 because HCP attention was focused on delivering care to the mother and/or baby  
36  
37 (Table 2 – 2.1). Whilst all HCP groups felt the midwife was the most appropriate  
38  
39 person to support and communicate with the father, they acknowledged that she had  
40  
41 other responsibilities at the time (Table 2 – 2.2). Communication with the parents  
42  
43 during the resuscitation was usually directed towards the mother. Participants  
44  
45 thought this was appropriate because unlike the father, most mothers could not see  
46  
47 what was happening. In addition, HCPs believed that fathers could hear what was  
48  
49 being said. Consequently fathers received limited direct information and support and  
50  
51 this was generally only given on an 'ad hoc' basis.  
52  
53  
54  
55  
56  
57  
58  
59  
60

1  
2  
3 Any information that was given to fathers during the resuscitation was usually  
4  
5 provided by an anaesthetist or midwife. This was most commonly general  
6  
7 information because they did not feel it was their responsibility to give more detail at  
8  
9 this time. On occasions when the resuscitation was prolonged neonatal nurses  
10  
11 sometimes went over to the parents to explain what was happening when the baby's  
12  
13 condition had been stabilised (Table 2 – 2.3). Once resuscitation was completed  
14  
15 some babies required NNU admission whilst others remained with their parents.  
16  
17 Paediatricians, neonatal nurse practitioners and neonatal nurses described speaking  
18  
19 to the parents at this time. However, midwives also recalled advocating for parents  
20  
21 by prompting paediatricians to speak to parents before they left the delivery room.  
22  
23 All HCP groups discussed whether they debriefed the fathers after the resuscitation.  
24  
25 Most midwives described attempting to speak to the father by himself to explain what  
26  
27 had happened and correct misunderstandings. However, in many instances this was  
28  
29 not possible because of other demands or lack of opportunity. Anaesthetists and  
30  
31 obstetricians felt it was not appropriate for them to debrief fathers and although  
32  
33 paediatricians, neonatal nurse practitioners and neonatal nurses recalled instances  
34  
35 when they had done this, the discussion was usually initiated by the father days or  
36  
37 weeks later, when the baby was being cared for in the NNU. A general reluctance to  
38  
39 get involved in these discussions was reported, particularly amongst neonatal nurses  
40  
41 who had been present during the resuscitation (Table 2 – 2.4). They felt  
42  
43 uncomfortable discussing events particularly if they thought the father would become  
44  
45 distressed. They were also concerned about being asked questions they could not  
46  
47 answer.  
48  
49  
50  
51  
52  
53  
54  
55

## 56 **Saying and doing**

57  
58  
59  
60

1  
2  
3  
4  
5 Participants reflected on factors that influenced what they said to fathers and the  
6  
7 ways they supported them during and after the resuscitation. Anaesthetists and  
8  
9 midwives acknowledged that they usually only gave fathers general information  
10  
11 during the resuscitation because they were uncertain what was happening or how  
12  
13 the baby was responding. However, they tried to say something positive such as  
14  
15 commenting on the amount or colour of the baby's hair.  
16  
17  
18  
19

20  
21 When paediatricians, neonatal nurse practitioners and neonatal nurses spoke to  
22  
23 parents after the resuscitation the information given varied, ranging from detailed  
24  
25 information to a more general summary of events. Needing to get the baby to the  
26  
27 NNU as quickly as possible appeared to influence the nature and extent of  
28  
29 information given. Consequently parents whose baby required more extensive  
30  
31 resuscitation were often given the least amount of information.  
32  
33  
34  
35

36 Being able to draw on previous experience and background knowledge was felt to be  
37  
38 invaluable. However, most participants had not received any education or training  
39  
40 about communicating with fathers, either generally or in specific situations such as  
41  
42 newborn resuscitation. More senior HCPs also said they did not address these  
43  
44 issues in their teaching (Table 3 – 3.1). Midwives who had trained more recently had  
45  
46 received some teaching about supporting fathers in general, but this was minimal. All  
47  
48 HCPs felt their way of supporting and communicating with fathers had evolved  
49  
50 through experience. Some midwives and anaesthetists felt they had become skilled  
51  
52 at observing non-verbal cues portrayed by fathers and this enabled them to support  
53  
54 them more effectively. Other HCPs drew on experience in related specialties, taking  
55  
56  
57  
58  
59  
60

1  
2  
3 personal responsibility for their own learning, discussions with fathers and reflection  
4  
5 on their practice (Table 3 – 3.2).  
6  
7

8  
9  
10 In developing their ways of supporting and communicating with fathers, HCPs said  
11 they drew on two other elements: observing the practice of others and thinking about  
12 how they would like to be treated. They described learning from mentors, senior  
13 colleagues, their peers or junior staff, and recalled both positive and negative  
14 scenarios (Table 3 – 3.3). Obstetricians often specifically mentioned learning good  
15 practice from midwives. Several HCPs used the phrase “putting yourself in their  
16 shoes.” Female HCPs modified this approach to thinking about how they would like  
17 their partner to be treated (Table 3 – 3.4). Despite the various strategies developed  
18 over time all HCP groups said they often did not know what to say to fathers during  
19 prolonged episodes of resuscitation (Table 3 – 3.5).  
20  
21  
22  
23  
24  
25  
26  
27  
28  
29  
30  
31  
32  
33

### 34 **Teamwork**

35  
36  
37  
38 Participants identified the importance of effective teamwork during the resuscitation.  
39 They felt that when the team worked well together, the situation was usually dealt  
40 with quickly and smoothly to the benefit of all concerned, including the father. Senior  
41 HCPs described having an ‘instinctive’ way of working with their colleagues such that  
42 verbal communication was not required. They described scenarios when those  
43 present spontaneously took on different roles and responsibilities assisting and  
44 supporting each other (Table 4 – 4.1). Obstetricians and anaesthetists recalled  
45 distracting the father so their colleagues could focus on the resuscitation.  
46  
47  
48  
49  
50  
51  
52  
53  
54  
55  
56  
57  
58  
59  
60  
61  
62  
63  
64  
65  
66  
67  
68  
69  
70  
71  
72  
73  
74  
75  
76  
77  
78  
79  
80  
81  
82  
83  
84  
85  
86  
87  
88  
89  
90  
91  
92  
93  
94  
95  
96  
97  
98  
99  
100  
101  
102  
103  
104  
105  
106  
107  
108  
109  
110  
111  
112  
113  
114  
115  
116  
117  
118  
119  
120  
121  
122  
123  
124  
125  
126  
127  
128  
129  
130  
131  
132  
133  
134  
135  
136  
137  
138  
139  
140  
141  
142  
143  
144  
145  
146  
147  
148  
149  
150  
151  
152  
153  
154  
155  
156  
157  
158  
159  
160  
161  
162  
163  
164  
165  
166  
167  
168  
169  
170  
171  
172  
173  
174  
175  
176  
177  
178  
179  
180  
181  
182  
183  
184  
185  
186  
187  
188  
189  
190  
191  
192  
193  
194  
195  
196  
197  
198  
199  
200  
201  
202  
203  
204  
205  
206  
207  
208  
209  
210  
211  
212  
213  
214  
215  
216  
217  
218  
219  
220  
221  
222  
223  
224  
225  
226  
227  
228  
229  
230  
231  
232  
233  
234  
235  
236  
237  
238  
239  
240  
241  
242  
243  
244  
245  
246  
247  
248  
249  
250  
251  
252  
253  
254  
255  
256  
257  
258  
259  
260  
261  
262  
263  
264  
265  
266  
267  
268  
269  
270  
271  
272  
273  
274  
275  
276  
277  
278  
279  
280  
281  
282  
283  
284  
285  
286  
287  
288  
289  
290  
291  
292  
293  
294  
295  
296  
297  
298  
299  
300  
301  
302  
303  
304  
305  
306  
307  
308  
309  
310  
311  
312  
313  
314  
315  
316  
317  
318  
319  
320  
321  
322  
323  
324  
325  
326  
327  
328  
329  
330  
331  
332  
333  
334  
335  
336  
337  
338  
339  
340  
341  
342  
343  
344  
345  
346  
347  
348  
349  
350  
351  
352  
353  
354  
355  
356  
357  
358  
359  
360  
361  
362  
363  
364  
365  
366  
367  
368  
369  
370  
371  
372  
373  
374  
375  
376  
377  
378  
379  
380  
381  
382  
383  
384  
385  
386  
387  
388  
389  
390  
391  
392  
393  
394  
395  
396  
397  
398  
399  
400  
401  
402  
403  
404  
405  
406  
407  
408  
409  
410  
411  
412  
413  
414  
415  
416  
417  
418  
419  
420  
421  
422  
423  
424  
425  
426  
427  
428  
429  
430  
431  
432  
433  
434  
435  
436  
437  
438  
439  
440  
441  
442  
443  
444  
445  
446  
447  
448  
449  
450  
451  
452  
453  
454  
455  
456  
457  
458  
459  
460  
461  
462  
463  
464  
465  
466  
467  
468  
469  
470  
471  
472  
473  
474  
475  
476  
477  
478  
479  
480  
481  
482  
483  
484  
485  
486  
487  
488  
489  
490  
491  
492  
493  
494  
495  
496  
497  
498  
499  
500  
501  
502  
503  
504  
505  
506  
507  
508  
509  
510  
511  
512  
513  
514  
515  
516  
517  
518  
519  
520  
521  
522  
523  
524  
525  
526  
527  
528  
529  
530  
531  
532  
533  
534  
535  
536  
537  
538  
539  
540  
541  
542  
543  
544  
545  
546  
547  
548  
549  
550  
551  
552  
553  
554  
555  
556  
557  
558  
559  
560  
561  
562  
563  
564  
565  
566  
567  
568  
569  
570  
571  
572  
573  
574  
575  
576  
577  
578  
579  
580  
581  
582  
583  
584  
585  
586  
587  
588  
589  
590  
591  
592  
593  
594  
595  
596  
597  
598  
599  
600  
601  
602  
603  
604  
605  
606  
607  
608  
609  
610  
611  
612  
613  
614  
615  
616  
617  
618  
619  
620  
621  
622  
623  
624  
625  
626  
627  
628  
629  
630  
631  
632  
633  
634  
635  
636  
637  
638  
639  
640  
641  
642  
643  
644  
645  
646  
647  
648  
649  
650  
651  
652  
653  
654  
655  
656  
657  
658  
659  
660  
661  
662  
663  
664  
665  
666  
667  
668  
669  
670  
671  
672  
673  
674  
675  
676  
677  
678  
679  
680  
681  
682  
683  
684  
685  
686  
687  
688  
689  
690  
691  
692  
693  
694  
695  
696  
697  
698  
699  
700  
701  
702  
703  
704  
705  
706  
707  
708  
709  
710  
711  
712  
713  
714  
715  
716  
717  
718  
719  
720  
721  
722  
723  
724  
725  
726  
727  
728  
729  
730  
731  
732  
733  
734  
735  
736  
737  
738  
739  
740  
741  
742  
743  
744  
745  
746  
747  
748  
749  
750  
751  
752  
753  
754  
755  
756  
757  
758  
759  
760  
761  
762  
763  
764  
765  
766  
767  
768  
769  
770  
771  
772  
773  
774  
775  
776  
777  
778  
779  
780  
781  
782  
783  
784  
785  
786  
787  
788  
789  
790  
791  
792  
793  
794  
795  
796  
797  
798  
799  
800  
801  
802  
803  
804  
805  
806  
807  
808  
809  
810  
811  
812  
813  
814  
815  
816  
817  
818  
819  
820  
821  
822  
823  
824  
825  
826  
827  
828  
829  
830  
831  
832  
833  
834  
835  
836  
837  
838  
839  
840  
841  
842  
843  
844  
845  
846  
847  
848  
849  
850  
851  
852  
853  
854  
855  
856  
857  
858  
859  
860  
861  
862  
863  
864  
865  
866  
867  
868  
869  
870  
871  
872  
873  
874  
875  
876  
877  
878  
879  
880  
881  
882  
883  
884  
885  
886  
887  
888  
889  
890  
891  
892  
893  
894  
895  
896  
897  
898  
899  
900  
901  
902  
903  
904  
905  
906  
907  
908  
909  
910  
911  
912  
913  
914  
915  
916  
917  
918  
919  
920  
921  
922  
923  
924  
925  
926  
927  
928  
929  
930  
931  
932  
933  
934  
935  
936  
937  
938  
939  
940  
941  
942  
943  
944  
945  
946  
947  
948  
949  
950  
951  
952  
953  
954  
955  
956  
957  
958  
959  
960  
961  
962  
963  
964  
965  
966  
967  
968  
969  
970  
971  
972  
973  
974  
975  
976  
977  
978  
979  
980  
981  
982  
983  
984  
985  
986  
987  
988  
989  
990  
991  
992  
993  
994  
995  
996  
997  
998  
999  
1000

1  
2  
3 junior paediatrician was having difficulty intubating the baby. Several midwives  
4 described responding to a crash call. They often took on the role of 'go-between,'  
5  
6 relaying information between the neonatal and obstetric teams and the parents. The  
7  
8 importance of senior HCPs supporting junior staff was also identified (Table 4 – 4.2).  
9  
10

### 11 12 13 14 **Impact on me**

15  
16  
17  
18 During the interviews, the HCPs frequently reflected on the impact of the event on  
19 themselves. During the resuscitation, HCPs described trying to adopt a calm and  
20 self-assured manner regardless of how they were feeling. They hoped this attitude  
21 would be transmitted to the father and as a consequence, he would be comforted  
22 and reassured. Many midwives however, said it was difficult to adopt this approach  
23 and when recounting specific events described them as being “awful”, “horrendous”,  
24  
25 “terrible” and “shocking.” Five HCPs (midwives and neonatal nurses) cried as they  
26 recalled the resuscitation and on two occasions, the recording was temporarily  
27 stopped. In a less extreme way, when they reflected on specific events, several  
28 midwives felt they should have done more to support the father (Table 5 – 5.1).  
29  
30  
31  
32  
33  
34  
35  
36  
37  
38  
39  
40  
41  
42

43 Another issue some paediatricians and the neonatal nurse practitioners talked about  
44 was when the father approached the resuscitator during the resuscitation. The  
45 neonatal nurse practitioners and some of the more senior paediatricians were  
46 comfortable with this and felt it did not impact on their practice in a negative way  
47 (Table 5 – 5.2). Others however, felt uneasy being watched so closely and felt it  
48 placed additional stress on them in an already pressurised situation (Table 5 – 5.3).  
49  
50  
51  
52  
53  
54  
55  
56  
57  
58  
59  
60

1  
2  
3 The HCPs rarely said the events they described had a positive impact on them. Their  
4 relief and satisfaction when all was well was usually implied rather than stated. This  
5 may be because in many cases, the busy nature of the care setting meant that they  
6 often quickly became involved in the care of other parents and babies with limited  
7 opportunity to reflect on what had happened. Midwives were the only HCPs who  
8 described becoming emotional when the resuscitation was successful. This is  
9 probably because in most cases they had been directly involved in the couple's care  
10 during labour.  
11  
12  
13  
14  
15  
16  
17  
18  
19

## 20 21 22 23 24 25 **DATA SHARING**

26  
27  
28  
29 No additional data available.  
30  
31  
32

## 33 34 35 **DISCUSSION**

36  
37  
38 This is the first reported study to explore the experiences and perceptions of HCPs  
39 involved in neonatal resuscitation in the delivery room when the baby's father was  
40 present. The interviews provide strong evidence of HCPs' perspectives of this type of  
41 scenario. Although all HCP groups said the fathers needed support and information  
42 during the resuscitation, it was acknowledged these needs were almost always  
43 unmet. This confirms a finding from an earlier phase of the broader study (6). In most  
44 cases HCPs felt their priorities at the time were the health of the baby or the mother.  
45 Although HCPs thought the midwife was probably best placed to support the father it  
46 was acknowledged that that she had a duty of care to the mother and was often  
47  
48  
49  
50  
51  
52  
53  
54  
55  
56  
57  
58  
59  
60

1  
2  
3 involved in her ongoing care. A key factor in the failure to meet the needs of fathers  
4  
5 appeared to be that none of the professional groups involved had direct  
6  
7 responsibility to support and communicate with him. It was frequently stated that “he  
8  
9 wasn’t my patient.”  
10

11  
12  
13  
14  
15  
16 Most HCPs were aware that in other care settings a designated HCP often supports  
17  
18 relatives when they witness resuscitation events (8,26,27). The role of the chaperone  
19  
20 is to explain what is happening and to support, reassure, and de-brief the relative.  
21  
22 They can also intervene if the relative’s behaviour becomes distracting (14,26). This  
23  
24 role is generally undertaken by a senior HCP, usually a nurse, who can provide  
25  
26 appropriate information and support (26). Whilst the HCPs suggested a chaperone  
27  
28 would be beneficial for fathers, it was felt staff shortages and lack of resources would  
29  
30 prevent this from happening.  
31  
32  
33  
34  
35  
36  
37  
38  
39  
40  
41  
42  
43  
44  
45  
46  
47  
48  
49  
50  
51  
52  
53  
54  
55  
56  
57  
58  
59  
60

The HCPs identified a number of factors that could have added to what would have  
already been a difficult experience for fathers. These factors included a lack of direct  
information at key points and situations where fathers were excluded or  
marginalised. Many HCPs also described the impact of events on them and aspects  
they found difficult. An issue that frequently occurred was what to say during  
prolonged resuscitation. Experienced HCPs as well as those who had been working  
in the specialty for a short time identified this difficulty. The more acute distress  
displayed by midwives and neonatal nurses during the interviews was most  
commonly because they felt the situation was not handled well and they felt culpable



1  
2  
3 to some extent. Obstetricians, anaesthetists and paediatricians were more 'matter-  
4 of-fact' about what happened and did not appear to feel responsible when a father's  
5 needs were not met. However, paediatricians described their discomfort when  
6 fathers came to the resuscitaire. This may indicate a lack of confidence in their ability  
7 or their recognition that the presence of the father can cause additional pressure at  
8 an already stressful time. This was explored in the early literature regarding WR in  
9 other care settings which reports that HCPs felt WR would have a negative impact  
10 on their practice (8,11,12). However, over time HCPs who have been exposed to  
11 WR have found ways to accommodate it in their practice.  
12  
13  
14  
15  
16  
17  
18  
19  
20  
21  
22  
23  
24

25 Guidance about supporting parents in the delivery room is given in the recently  
26 updated European and UK newborn life-support training programmes, mainly in  
27 relation to communicating with parents before, during and after the event (28,29).  
28 However, no specific guidance is given about ways to communicate with or ways to  
29 support the father. This would appear to be an area worthy of development given the  
30 lack of confidence that some HCPs expressed about communicating with fathers  
31 during resuscitation events, particularly when the resuscitation was prolonged.  
32  
33  
34  
35  
36  
37  
38  
39  
40  
41  
42

### 43 **STRENGTHS AND LIMITATIONS**

44  
45  
46  
47 The critical incident approach proved to be an appropriate way to explore HCPs'  
48 experiences of specific events. Asking participants to focus on the father enabled  
49 many of them to consider the impact of newborn resuscitation on fathers for the first  
50 time. Although participants sometimes talked about the parents collectively, the  
51 interviewer's subsequent probing questions encouraged them to concentrate on their  
52  
53  
54  
55  
56  
57  
58  
59  
60

1  
2  
3 experience with fathers. Some participants chose to describe events that occurred a  
4  
5 while ago. However, they had no difficulty remembering what happened and their  
6  
7 feelings at the time. As their description of events progressed, the HCPs were often  
8  
9 surprised at how clearly they could recall what happened. Whilst some found  
10  
11 describing events upsetting; none wished to discontinue the interview. None of the  
12  
13 HCPs chose to describe an incident where the baby did not survive. HCPs may have  
14  
15 thought that this was what was required, although this was not stated by the  
16  
17 interviewer. Alternatively, they may have deliberately elected not to recall an incident  
18  
19 that they thought they would find too sensitive or potentially controversial to discuss.  
20  
21 Although undertaken in one setting, the findings from this independent study provide  
22  
23 insight to the experiences and perceptions of HCPs and the context in which the  
24  
25 resuscitation events occurred (19). The extent to which the findings apply to other  
26  
27 HCPs encountering newborn resuscitation can therefore be considered. To gain a  
28  
29 broader view of HCPs' experiences and the longer term impact, this study could be  
30  
31 replicated with larger groups of HCPs. It would also be valuable to explore the  
32  
33 experiences of HCPs where the baby did not survive the resuscitation. Although  
34  
35 such a study would present challenges, it would have the potential to provide insight  
36  
37 to situations that could have profound and possibly long lasting effects on HCPs.  
38  
39 This in turn could influence the provision of HCP education, training and support in  
40  
41 the future.  
42  
43  
44  
45  
46  
47  
48

## 49 **IMPLICATIONS FOR PRACTICE**

50  
51  
52  
53  
54 To some extent newborn resuscitation is part of the normal working day for many  
55  
56 HCPs involved in neonatal care. However, some midwives and neonatal nurses  
57  
58  
59  
60

1  
2  
3 became distressed when discussing events some of which occurred some time ago  
4  
5 and yet remained a strong memory. This suggests there is a need for greater  
6  
7 recognition of the impact of resuscitation events on HCPs. The provision of  
8  
9 opportunities for formal and informal reflection on practice, debriefing and support  
10  
11 could be more extensive.  
12  
13

14  
15  
16 The HCPs were generally aware of the needs of fathers during and after newborn  
17  
18 resuscitation. However, a number of difficulties and challenges affected how they  
19  
20 supported and communicated with fathers. Whilst there is increasing evidence  
21  
22 pertaining to the needs of fathers, in maternity care, HCPs generally focus on the  
23  
24 needs of mothers and babies (30); duty of care and professional responsibilities  
25  
26 determine this. Nevertheless, it would appear that there is scope for much more  
27  
28 extensive HCP education and training about supporting and communicating with  
29  
30 fathers around the time of newborn resuscitation. The allocation of resources to  
31  
32 support the provision of a chaperone for fathers during resuscitation would also be  
33  
34 worthy of consideration by service providers (8,14).  
35  
36  
37  
38  
39

#### 40 **ACKNOWLEDGEMENTS**

41  
42  
43  
44  
45 We would like to thank the health care professionals who participated in this study  
46  
47 and were willing to share their experiences so readily.  
48  
49

#### 50 **COMPETING INTERESTS**

1  
2  
3 Both authors have completed the Unified Competing Interest form at  
4  
5 [http://www.icmje.org/coi\\_disclosure.pdf](http://www.icmje.org/coi_disclosure.pdf) (available on request from the corresponding  
6  
7 author) and declare: no support from any organisation for the submitted work; no  
8  
9 financial relationships with any organisations that might have an interest in the  
10  
11 submitted work in the previous three years, no other relationships or activities that  
12  
13 could appear to have influenced the submitted work.  
14  
15  
16  
17  
18  
19  
20  
21  
22  
23

## 24 25 **FUNDING**

26  
27  
28  
29 Development and approval of the study, participant recruitment, data collection and  
30  
31 initial data analysis were undertaken when the first author held the Bliss Neonatal  
32  
33 Nurse Research Fellow post at the National Perinatal Epidemiology Unit, University  
34  
35 of Oxford. The first author's PhD fees were met by Birmingham City University and  
36  
37 the first author. All other expenses were met by the first author. Aston University was  
38  
39 the sponsor. This included providing University approval for the study and ensuring  
40  
41 the study was carried out in accordance with the Research Governance Framework.  
42  
43  
44  
45  
46  
47  
48

## 49 50 **AUTHORS' CONTRIBUTIONS**

51  
52  
53  
54 Dr M.E Harvey (MH) developed and designed the research proposal, negotiated  
55  
56 access to the study-site, obtained the required approvals, recruited participants,  
57  
58  
59  
60

1  
2  
3 conducted the interviews, undertook the data analysis and wrote the first draft of this  
4  
5 paper. Professor HM Pattison (HP) supervised MH throughout the study, agreed the  
6  
7 coding framework, contributed to and has agreed the final version of the paper. MH  
8  
9 is the guarantor.  
10

11  
12  
13  
14 The Corresponding Author has the right to grant on behalf of all authors and does  
15  
16 grant on behalf of all authors, an exclusive licence on a worldwide basis to the BMJ  
17  
18 Publishing Group Ltd and its Licensees to permit this article (if accepted) to be  
19  
20 published in BMJ editions and any other BMJ PGL products and sub-licences to  
21  
22 exploit all subsidiary rights, as set out in our licence.  
23  
24

## 25 REFERENCES

- 26  
27  
28 1. Kiernan K, Smith K. Unmarried Parenthood: New Insights from the Millennium  
29  
30 Cohort Study. *Popul Trends*. 2003;26-33  
31  
32  
33  
34 2. TNS System Three. *NHS Maternity Services Quantitative Research*.  
35  
36 Edinburgh: TNS System Three 2005;44-57  
37  
38  
39  
40  
41 3. Murthy V, Rao N, Fox GF, Milner AD, Campbell M, Greenough A. Survey of  
42  
43 UK newborn resuscitation practices. *Arch Dis Child Fetal Neonatal Ed*.  
44  
45 2012;97:F154-5  
46  
47  
48  
49 4. Fulbrook P, Latour JM, Albarra, JW. Paediatric critical care nurses' attitudes  
50  
51 and experiences of parental presence during cardiorespiratory resuscitation:  
52  
53 A European survey. *Int J Nurs Stud*. 2007;44:1238-1249  
54  
55  
56  
57  
58  
59  
60

- 1  
2  
3 5. Perry SE. Support for parents witnessing resuscitation: nurse perspectives.  
4  
5 *Paed Nurs.* 2009;21:26-31  
6  
7  
8
- 9  
10 6. Harvey ME, Pattison HM, Being there: a qualitative interview study with  
11  
12 fathers present during the resuscitation of their baby at delivery. *Arch Dis*  
13  
14 *Child Fetal Neonatal Ed.* 2012;97:F439-F443  
15  
16  
17  
18  
19
- 20  
21 7. Sacchetti A, Carraccio C, Leva E, Harris RH, Lichenstein R. Acceptance of  
22  
23 family member presence during pediatric resuscitations in the emergency  
24  
25 department: Effects of personal experience. *Pediatr Emerg Care.* 2000;  
26  
27 16:85-87  
28  
29  
30  
31  
32  
33
- 34 8. Grice AS, Picton P, Deakin CDS. Study examining attitudes of staff,  
35  
36 paediatrics and relatives to witnessed resuscitation in adult intensive care  
37  
38 units. *Br J Anaesth.* 2003;91:820-824  
39  
40  
41  
42  
43
- 44 9. Fulbrook P, Albarran JW, Latour JM. A European survey of critical care  
45  
46 nurses' attitudes and experiences of having family members present during  
47  
48 cardiorespiratory resuscitation *Int J Nurs Stud.* 2005;42:557-568  
49  
50  
51
- 52 10. McGahey PR. Family presence during pediatric resuscitation: focus on staff  
53  
54  
55 *Critic Care Nurs.* 2002;22:29-34  
56  
57  
58  
59  
60

- 1  
2  
3 11. Schilling RJ. Should relatives watch resuscitation? – No room for spectators  
4  
5 *BMJ*. 1994;309:406  
6  
7  
8  
9  
10 12. MacLean SL, Guzzetta CE, White C, Fontaine D, Eichhorn DJ, Meyers TA et  
11  
12 al. Family presence during cardiopulmonary resuscitation and invasive  
13  
14 procedures: practices of critical care and emergency nurses *Am J Crit Care*.  
15  
16 2003;12:246- 257  
17  
18  
19  
20 13. American Academy of Pediatrics. Family-Centred Care and the Pediatricians  
21  
22 Role *Pediatrics*. 2003;112:691-696  
23  
24  
25  
26  
27 14. Baskett PJF, Steen PA, Bossaert L. European Resuscitation Council  
28  
29 Guidelines for Resuscitation 2005 - Section 8. The ethics of resuscitation and  
30  
31 end-of-life decisions *Resuscitation*. 2005;67:S171-S180  
32  
33  
34  
35  
36  
37 15. Broström A, Strömberg A, Dahlström U, Fridlund B. Congestive heart failure,  
38  
39 spouses' support and the couple's sleep situation: a critical incident technique  
40  
41 analysis *J Clin Nurs*. 2003;12: 223-233  
42  
43  
44  
45  
46 16. O'Leary Z. *The Essential Guide to Doing Research*. London: Sage  
47  
48 Publications 2004  
49  
50  
51  
52  
53 17. Flanagan JC. The critical interview technique *Psychology Bulletin*.  
54  
55 1954;51:327-358  
56  
57  
58  
59  
60

- 1  
2  
3 18. Sharoff L. Critique of the critical incident technique *J Res Nurs*. 2008;13:301-  
4 309  
5  
6  
7  
8  
9  
10 19. Pope C, Campbell R. Qualitative research in obstetrics and gynaecology. *Brit*  
11 *J Obstet Gynaec*. 2001;108:233-237  
12  
13  
14  
15  
16 20. Kvale S, Brinkmann S. *Interviews: Learning the Craft of Qualitative Research*  
17 *Interviewing*. Second edition. Los Angeles: Sage 2009  
18  
19  
20 21. Robson C. *Real world research*. Third edition. Oxford: Blackwell Publishing  
21 2012  
22  
23  
24  
25  
26  
27 22. Silvester J. Work and Organizational Psychology in Willig C, Stainton-Rogers  
28 *W. The Sage Handbook of Qualitative Research in Psychology*. London:  
29 Sage Publications 2008  
30  
31  
32  
33  
34  
35  
36  
37 23. Pope C, Ziebland S, Mays N. Analysing qualitative data. *BMJ*. 2000;320:114-  
38 116  
39  
40  
41  
42  
43  
44 24. Lewins A, Silver C. *Using software in qualitative research*. London: Sage  
45 Publications 2007  
46  
47  
48  
49  
50 25. Malterud K. Qualitative research: standards, challenges and guidelines.  
51 *Lancet*. 2001;358:483-488  
52  
53  
54  
55  
56  
57  
58  
59  
60



- 1  
2  
3 26. Goldstein A, Berry K, Callaghan A. Resuscitation witnessed by relatives has  
4  
5 proved acceptable to doctors in paediatric cases. *BMJ*. 1997;314:144-145  
6  
7  
8  
9  
10 27. Robinson SM, Mackenzie-Ross S, Campbell Hewson GL, Egleston CV,  
11  
12 Prevost AT. Psychological effect of witnessed resuscitation on bereaved  
13  
14 relatives. *Lancet*. 1998;352:614-617  
15  
16  
17  
18 28. Nolan JP, Soar J, Zideman DA, *et al* European Resuscitation Council  
19  
20 Guidelines for Resuscitation 2010 Section 1. Executive summary.  
21  
22 *Resuscitation*. 2010;81:1219-1276  
23  
24  
25  
26  
27 29. Resuscitation Council. *Resuscitation at birth*. Third edition. London:  
28  
29 Resuscitation Council (UK) 2011  
30  
31  
32  
33  
34 30. McVeigh CA, Baafi M, Williamson M. Functional status after fatherhood: An  
35  
36 Australian study. *J Obstet Gynecol Neonatal Nurs*. 2002;31:165-171  
37  
38  
39  
40  
41  
42  
43  
44  
45  
46  
47  
48  
49  
50  
51  
52  
53  
54  
55  
56  
57  
58  
59  
60

| HCP Group                    | No. | Sex                | Time from initial qualification | Length of time in current post |
|------------------------------|-----|--------------------|---------------------------------|--------------------------------|
| Midwives                     | 12  | Female*            | 1 – 29 years                    | 6 months – 5 years             |
| Neonatal nurses              | 10  | Female*            | 2 – 32 years                    | 6 months – 23 years            |
| Neonatal nurse practitioners | 2   | Female*            | 7 – 19 years                    | 6 months – 7 years             |
| Obstetricians                | 3   | Female             | 9 – 22 years                    | 1 – 6 years                    |
| Anaesthetists                | 4   | 2 Female<br>2 Male | 6 – 16 years                    | 1 – 6 years                    |
| Paediatrician                | 6   | 1 Female<br>5 male | 2 – 33 years                    | 2½ months – 18 years           |

\*No males were employed in this role during the period of recruitment

Table 1 Participant biographical details

1  
2  
3  
4  
5  
6  
7  
8  
9  
10  
11  
12  
13  
14  
15  
16  
17  
18  
19  
20  
21  
22  
23  
24  
25  
26  
27  
28  
29  
30  
31  
32  
33  
34  
35  
36  
37  
38  
39  
40  
41  
42  
43  
44  
45  
46  
47  
48  
49  
50  
51  
52  
53  
54  
55  
56  
57  
58  
59  
60

| Table 2 | Whose role?                                                                                                                                                                                                                                                                                          |
|---------|------------------------------------------------------------------------------------------------------------------------------------------------------------------------------------------------------------------------------------------------------------------------------------------------------|
| 2.1     | <i>"My main focus is the mother. I think that's, I think it's important to understand that because the mother's my patient, the father's not my patient."</i> (Anaesthetist14)                                                                                                                       |
| 2.2     | <i>"When the baby was born and she needed resuscitating, he ran out the room crying. I felt like I should have ran after him really which I couldn't at the time because I was trying to like stop her ((the mother)) from bleeding. So it was difficult but I did think, oh my God."</i> (Midwife9) |
| 2.3     | <i>"I at that time, I could not speak to dad because we, our priority was the baby and baby needed intubating. Once that was done I was able to then go and speak to mum just to give her brief information of what was going on, how the baby was."</i> (NeonatalNurse1)                            |
| 2.4     | <i>"It's not my place, just in case he asked me sensitive questions that I'm not able to answer. It's very difficult in that situation especially if you've got a very sick baby. I would not take part in that at all."</i><br>(NeonatalNurse5)                                                     |

---

**Table 3**      **Saying and doing**

---

- 3.1      *"I don't think it's anything that anybody's spoken about and I suppose I don't really speak to the trainees who come through about it either."*  
(Paediatrician16)
- 3.2      *"I think my practice is probably based on what I've heard husbands and partners tell me and how they felt."* (Midwife15)
- 3.3      *"I have a series of horror stories of observing my consultant teachers in days of yore making a complete and utter hash of it. And I use that you know and I just, you just learn by thinking, right, if I live a thousand years, I will never do that."* (Paediatrician15)
- 3.4      *"I always say, speak to people how you would want to be spoken to. Treat them the way you want to be treated and just put yourself in their situation. You know, it's your partner, that's your baby and somebody's not even acknowledging that you're there, how would that make you feel?"* (Obstetrician61)
- 3.5      *"It was awful. No-one was saying anything and mum was crying. I was just thinking please, please somebody say something."*  
(NeonatalNurse7)
-

1  
2  
3  
4  
5  
6  
7  
8  
9  
10  
11  
12  
13  
14  
15  
16  
17  
18  
19  
20  
21  
22  
23  
24  
25  
26  
27  
28  
29  
30  
31  
32  
33  
34  
35  
36  
37  
38  
39  
40  
41  
42  
43  
44  
45  
46  
47  
48  
49  
50  
51  
52  
53  
54  
55  
56  
57  
58  
59  
60

| Table 4 | Teamwork                                                                                                                                                                                                                                                                                                                                            |
|---------|-----------------------------------------------------------------------------------------------------------------------------------------------------------------------------------------------------------------------------------------------------------------------------------------------------------------------------------------------------|
| 4.1     | <i>"If I'm happy the mother's suturing is done and mum's not bleeding, mum's fine and everybody is working on the baby then I will stay and do whatever I can whether it's fetching for the paediatrician or whether it's staying and supporting mum and dad because the midwife's helping the paediatrician."</i> (Obstetrician10)                 |
| 4.2     | <i>"It's like yesterday the shoulder dystocia, the baby needed to be resuscitated. Me and the Shift Leader talked about it, like you know, you go over it like, oh that was awful and, oh he ((the father)) was crying, oh it was terrible and you just talk about it and then that helps you to kind of deal with what's happened."</i> (Midwife9) |

1  
2  
3  
4  
5  
6  
7  
8  
9  
10  
11  
12  
13  
14  
15  
16  
17  
18  
19  
20  
21  
22  
23  
24  
25  
26  
27  
28  
29  
30  
31  
32  
33  
34  
35  
36  
37  
38  
39  
40  
41  
42  
43  
44  
45  
46  
47  
48  
49  
50  
51  
52  
53  
54  
55  
56  
57  
58  
59  
60

---

| <b>Table 5</b> | <b>Impact on me</b>                                                                                                                                                                                               |
|----------------|-------------------------------------------------------------------------------------------------------------------------------------------------------------------------------------------------------------------|
| 5.1            | <i>“You try and support the fathers and meet their needs when it happens. I do have days where I go home deflated thinking I really wish I could have done more for him that day.” (Midwife12)</i>                |
| 5.2            | <i>“I don’t mind it at all. I’m used to people watching what I do and I think he needs to see anyway.” (NeonatalNursePractitioner14)</i>                                                                          |
| 5.3            | <i>“I don’t like it. Not because it’s a worry to me it’s just because I don’t happen to like being watched when I’m working.” (Paediatrician7)</i>                                                                |
| 5.4            | <i>“Yes. Even now, after all this time, there are some difficult deliveries and you want to, you share in all of that emotion and it’s very easy to kind of get prickly eyes when the baby is ok.” (Midwife7)</i> |

---

## Interview schedule

Opening statement: **This interview forms part of a larger study that aims to gain an understanding of the experiences and perceptions of fathers who attend the birth of their baby, especially when the baby has required resuscitation at birth and / or admission to a neonatal unit.**

**Within this interview I am particularly interested in your experience of situations when a sick / preterm baby is delivered, requires resuscitation at birth and / or admission to a neonatal unit, and the baby's father is present. Before consideration of key issues, can I clarify the following?**

**Job title / Qualifications / Length of time qualified / Length of time this post**

### KEY ISSUES TO EXPLORE

**There are a variety of situations that you might have experienced:**

- **The antenatal preparation of fathers (i.e. before labour has started) particularly if the birth of a sick / preterm baby is anticipated.**
- **Being at the delivery of a sick / preterm baby when the baby's father is also present.**
- **Being at the resuscitation of a newborn baby when the baby's father is also present.**
- **Being present when a baby is admitted to the neonatal unit when the baby's father is also present.**

**Which of the above do you have experience of?**

**When was the last time that you encountered each situation?**

*(check each individual situation)*

**So, for the purpose of this interview we'll be talking about you .....**

- *Being involved in the antenatal preparation of fathers (i.e. before labour has started) particularly if the birth of a sick / preterm baby is anticipated.*
- *Being at the delivery of a sick / preterm baby when the baby's father is also present.*
- *Being at the resuscitation of a newborn baby when the baby's father is also present.*
- *Being present when a baby is admitted to the neonatal unit when the baby's father is also present.*

**Can you recall an occasion you were involved with relating to .....**

*Follow up any specific information to clarify description of events.*

*Clarify participant's role in the situation – what did you do / say?*

*Why does this case particularly spring to mind?*

**Is there anything that you'd like to add, particularly regarding what happened to the father?**

*Follow up any specific information to clarify description of events.*

*Clarify participant's role in the situation – what did you do / say?*

*Do you know if the father wanted to be there?*

**Thinking back to that occasion, do you think that the situation went well or not as well as it could have done?**

1  
2  
3 *Why do you think this was the case?*

4  
5 **What about the father in this case? – looking at it from his perspective – did it go well**  
6 **or not as well as it could have done?**

7 *Why do you think this was the case?*

8  
9 **Can you recall a contrasting situation you were involved with, by that I mean one that**  
10 **didn't / did go well?– can you tell me about that?**

11 *Follow up any specific information to clarify description of events.*

12 *Clarify details / participant's role in the situation – what did you do / say?*

13 *What do you think were the key issues that made this situation different to the previous*  
14 *case?*

15 *Why does this case particularly spring to mind?*

16  
17  
18 **Is there anything that you'd like to add, particularly regarding what happened to the**  
19 **father?**

20 *Follow up any specific information to clarify description of events.*

21 *Clarify participant's role in the situation – what did you do / say?*

22 *From his perspective do you think that he'd say it went well or not as well as it could have*  
23 *done?*

24 *Clarify participant's role in the situation – what did you do / say?*

25  
26 **What do you suppose fathers feel that they need in terms of information / support**  
27 **antenatally / prior to the delivery / resuscitation / admission of their baby?**

28 *On what basis do you say this?*

29 *In your experience, do you think this happens in reality?*

30 *Why does / doesn't this happen?*

31 *What do think are the issues that a health care professional should consider when*  
32 *supporting a father at this time?*

33 *Do you think that different fathers have different needs? – if so – how do you determine*  
34 *individual needs?*

35 *Which health care professional group do you think has ultimate responsibility for supporting*  
36 *fathers at this time?*

37  
38 **What do you suppose fathers feel that they need in terms of information / support**  
39 **during the delivery / resuscitation / admission of their baby?**

40 *On what basis do you say this?*

41 *In your experience, do you think this happens in reality?*

42 *Why does / doesn't this happen?*

43 *What do you think are the issues that a health care professional should consider when*  
44 *supporting a father at this time?*

45 *Do you think that different fathers have different needs? – if so – how do you determine*  
46 *individual needs?*

47 *How do you determine if the father wants to be there?*

48 *Which health care professional group do you think has ultimate responsibility for supporting*  
49 *fathers at this time?*

50  
51 **What do you suppose fathers feel that they need in terms of information / support**  
52 **after the delivery / resuscitation / admission of their baby?**

53 *On what basis do you say this?*

54 *What impact do you think being present at..... has on fathers?*

55 *In your experience, do you think this happens in reality?*

56 *Why does / doesn't this happen?*

57 *What do you think are the issues that a health care professional should consider when*  
58 *supporting a father at this time?*



1  
2  
3 Do you think that different fathers have different needs? – if so – how do you determine  
4 individual needs?  
5 Which health care professional group do you think has ultimate responsibility for supporting  
6 fathers at this time?  
7

8 **Can you tell me about the nature / extent of any educational preparation you've**  
9 **received regarding the provision of support specifically for fathers during delivery /**  
10 **resuscitation / admission to the neonatal unit?**

11 *Clarify details.*

12 *Have you participated in 'mock' incidents? For example: labour ward drill?).*

13 *Was it father / mother / parent focused?*

14 *Has this been adequate?*

15 *If no how do you now know what to do / say in these situations? What additional educational*  
16 *preparation do you feel you need?*

17 *Apart from more formal educational preparation, how else have you learned what to do / say*  
18 *in these situations?*  
19

20 **We've talked quite a lot about the health care professional role when supporting**  
21 **fathers – I'd like now to ask you to think about the impact that carrying out this role**  
22 **has on you – can you tell me about that?**

23 *Positive / negative impact – particularly re: helping / supporting fathers.*

24 *Short & long-term effects.*

25 *Is this always the case or just sometimes?*

26 *If sometimes – what key factors trigger this effect on you?*

27 *Re: negative effects – how do you deal / cope with this?*

28 *In these situations is there anything that fathers could do to help you?*  
29

30 **Do you have any suggestions about ways that hospitals / health care professionals**  
31 **could help fathers who experience the situations we've discussed?**

32 *Follow-up any specific issues that might have been raised earlier.*

33 *Does the hospital have policies / procedures / guidelines re: supporting / care of fathers? – if*  
34 *yes – clarify details – if not – why not? – do you think that there should be policies /*  
35 *procedures / guidelines in place?*

36 *What advice would you give to another health care professional who might be about to*  
37 *support a father in one of these situations for the first time?*  
38

39 **Are there any other issues that you would like to raise in relation to these issues?**  
40

41 **Can I end by asking some more information about yourself?**

42 **Age / How would you describe your ethnicity /**  
43  
44

45 **Thank-you very much for your help with this part of the study.**  
46  
47  
48  
49  
50  
51  
52  
53  
54  
55  
56  
57  
58  
59  
60



**The impact of a father's presence during newborn resuscitation: a qualitative interview study with health care professionals**

|                                 |                                                                                                                     |
|---------------------------------|---------------------------------------------------------------------------------------------------------------------|
| Journal:                        | <i>BMJ Open</i>                                                                                                     |
| Manuscript ID:                  | bmjopen-2013-002547.R1                                                                                              |
| Article Type:                   | Research                                                                                                            |
| Date Submitted by the Author:   | 17-Feb-2013                                                                                                         |
| Complete List of Authors:       | Harvey, MerryI; Birmingham City University, Child Health<br>Pattison, Helen; Aston University, Life Health Sciences |
| <b>Primary Subject Heading</b>: | Paediatrics                                                                                                         |
| Secondary Subject Heading:      | Qualitative research, Paediatrics, Obstetrics and gynaecology                                                       |
| Keywords:                       | NEONATOLOGY, Neonatal intensive & critical care < INTENSIVE & CRITICAL CARE, QUALITATIVE RESEARCH                   |
|                                 |                                                                                                                     |

SCHOLARONE™  
Manuscripts

1  
2  
3 **The impact of a father's presence during newborn resuscitation: a qualitative**  
4  
5 **interview study with health care professionals**  
6  
7  
8  
9

10  
11  
12 Merryl E Harvey, Helen M Pattison  
13

14  
15  
16  
17  
18 Merryl E Harvey senior academic Faculty of Health, Birmingham City University,  
19  
20 Birmingham B15 3TN Helen M Pattison professor School of Life Health Sciences,  
21  
22 Aston University B4 7ET  
23  
24  
25  
26  
27  
28  
29  
30  
31  
32  
33  
34  
35  
36  
37  
38  
39  
40  
41  
42  
43  
44  
45  
46  
47  
48  
49  
50  
51  
52  
53

54 Correspondence to: Dr Merryl E Harvey [merryl.harvey@bcu.ac.uk](mailto:merryl.harvey@bcu.ac.uk)  
55  
56  
57  
58  
59  
60

## ABSTRACT

**Objective:** To explore health care professionals' experiences around the time of newborn resuscitation in the delivery room, when the baby's father was present.

**Design:** A qualitative descriptive, retrospective design using the critical incident approach. Tape-recorded semi-structured interviews were undertaken with health care professionals involved in newborn resuscitation. Participants recalled resuscitation events when the baby's father was present. They described what happened and how those present, including the father, responded. They also reflected upon the impact of the resuscitation and the father's presence on themselves. Participant responses were analysed using thematic analysis.

**Setting:** A large teaching hospital in the UK.

**Participants:** Purposive sampling was utilised. It was anticipated that 35-40 participants would be recruited. Forty-nine potential participants were invited to take part. The final sample consisted of 37 participants including midwives, obstetricians, anaesthetists, neonatal nurse practitioners, neonatal nurses and paediatricians.

**Results:** Four themes were identified: 'whose role?' 'saying and doing' 'teamwork' and 'impact on me'. Whilst no-one was delegated to support the father during the resuscitation, midwives and anaesthetists most commonly took on this role. Participants felt the midwife was the most appropriate person support fathers. All health care professional groups said they often did not know what to say to fathers during prolonged resuscitation. Teamwork was felt to be of benefit to all concerned, including the father. Some paediatricians described their discomfort when fathers came to the resuscitaire. None of the participants had received education and training specifically on supporting fathers during newborn resuscitation.

1  
2  
3 **Conclusions** This is the first known study to specifically explore the experiences of  
4 health care professionals of the father's presence during newborn resuscitation. The  
5 findings suggest the need for more focused training about supporting fathers. There  
6 is also scope for service providers to consider ways in which fathers can be  
7 supported more readily during newborn resuscitation.  
8  
9  
10  
11  
12  
13  
14  
15  
16  
17  
18  
19  
20  
21  
22  
23  
24  
25  
26  
27  
28  
29  
30  
31  
32  
33  
34  
35  
36  
37  
38  
39  
40  
41  
42  
43  
44  
45  
46  
47  
48  
49  
50  
51  
52  
53  
54  
55  
56  
57  
58  
59  
60

## ARTICLE SUMMARY

### Article Focus:

The research question for this study was; 'What are the experiences of health care professionals of the father's presence during newborn resuscitation in the delivery room?' To address this question, the objectives of this phase of the study were:

1. To conduct interviews utilising the critical incident approach with HCPs who had experience of newborn resuscitation when the baby's father was present.
2. To provide an account of the experiences of HCPs of newborn resuscitation when the baby's father was present.

### Key messages:

The key messages and significance of the study are:

1. Whilst the health care professionals were aware of the information and support needs of fathers during newborn resuscitation, they acknowledged that these needs were rarely met.
2. The health care professionals in this study had not received education and training specifically about supporting fathers during newborn resuscitation.
3. The health care professionals in this study did not utilize strategies to support fathers that are recommended when relatives are present during resuscitation events in other critical care settings.

1  
2  
3  
4  
5  
6  
7  
8 Strengths and limitations:  
9

- 10
- 11 • Although undertaken in one setting, the findings from this independent study  
12 provide insight to the experiences and perceptions of HCPs and the context in  
13 which the resuscitation events occurred  
14
  - 15 • The critical incident approach was generally an appropriate way to explore  
16 HCPs' experiences of specific events. This approach enabled many of them  
17 to consider the impact of newborn resuscitation on fathers for the first time.  
18
  - 19 • Some participants found focusing on issues pertaining to the father more  
20 difficult and sometimes talked about the mother or the parents collectively.  
21 However, subsequent probing questions encouraged them to concentrate on  
22 the father.  
23
  - 24 • Some participants chose to describe events that occurred a while ago. It is  
25 therefore difficult to determine the extent to which recall bias influenced their  
26 descriptions. However, they appeared to have no difficulty remembering their  
27 feelings or what happened. They were often surprised at how clearly they  
28 could recall the event.  
29
  - 30 • Incidents where the baby did not survive were not described. HCPs may have  
31 thought the researchers were only interested in events where the baby  
32 survived, although this was not stated by the interviewer. Alternatively, they  
33 may have deliberately elected not to recall an incident that they thought might  
34 be too sensitive or potentially controversial to discuss.  
35  
36  
37  
38  
39  
40  
41  
42  
43  
44  
45  
46  
47  
48  
49  
50  
51  
52  
53  
54  
55  
56  
57  
58  
59  
60

- Whilst the preliminary data analysis was undertaken by the first author, the thematic framework was discussed with the second author as it was developed and the final framework was agreed by both authors.
- Given the qualitative nature of this study, it is inappropriate to generalize the findings to the wider population. However, in accordance with the notion of transferability, the findings of this study have highlighted issues that may be of relevance in other settings.



## INTRODUCTION

The birth of their child is often a landmark event for a father and can be an important episode in the on-going process of adaptation to parenthood. Short and more longer term benefits of a father's involvement in the life of his child have been described which can impact on the father, his partner, his baby and society more generally (1,2,3). As a consequence there has been a drive in the UK over the last 10 years to engage and involve fathers more readily, particularly during the perinatal period and during childbirth specifically (4,5,6). However, in order to ensure that fathers are appropriately supported during the perinatal period, it is important that health care professionals (HCPs) have insight to fathers' experiences and needs.

Whilst for the majority of men childbirth is straightforward, for others it is not.

When a newborn baby requires resuscitation in UK settings, the father will usually be present because most fathers attend the birth of their baby and delivery and resuscitation generally take place in the same room (7,8,9). Whilst some studies have investigated the impact on HCPs of parental presence during neonatal resuscitation in the neonatal unit (NNU) (10,11); the father's presence during newborn resuscitation in the delivery room has only been reported in terms of the impact on the father (12).

The experiences of HCPs of the presence of a relative during the resuscitation of a family member has been investigated in settings such as adult and paediatric

1  
2  
3 intensive care and accident and emergency (13,14,15). Early 'witnessed  
4  
5 resuscitation' (WR) research identified that many HCPs were not supportive of this  
6  
7 approach (16). They were concerned that relatives would be unduly distressed or  
8  
9 would be at risk of physical harm due to the nature of the environment. HCPs also  
10  
11 felt WR would impinge on themselves and their practice in a negative way  
12  
13 (14,17,18). However, despite some initial opposition, most HCPs now embrace the  
14  
15 concept of WR and it has become accepted practice in many Western countries over  
16  
17 the last two decades. This reflects a generally more open and inclusive approach to  
18  
19 health care and recognition of the need to deliver family-centred care (19,20).  
20  
21  
22  
23

24  
25 The feelings and perceptions of HCPs' experiences and perceptions of the father's  
26  
27 presence during newborn resuscitation in the delivery room do not appear to have  
28  
29 been previously investigated. The aim of this part of a wider study (12) was to gain a  
30  
31 broader understanding of fathers' experiences through HCPs' accounts of episodes  
32  
33 of care. Participants also reflected on the ways in which the father's presence  
34  
35 impacted on themselves and their practice. This paper focuses on the findings  
36  
37 pertaining to the experiences of HCPs of a father's presence during newborn  
38  
39 resuscitation.  
40  
41  
42  
43

## 44 45 **METHOD**

46  
47  
48  
49 A qualitative descriptive, retrospective design was utilised using the critical incident  
50  
51 approach (21).  
52  
53  
54

## 55 56 **Participants**

1  
2  
3  
4  
5 Purposive sampling was utilised to recruit participants from one large teaching  
6 hospital in the UK. It was anticipated that 35-40 participants would be required in  
7 order to obtain descriptions of a range of scenarios. Therefore recruitment, data  
8 collection and data analysis occurred concurrently until data saturation was  
9 achieved. The only inclusion criterion was that the HCP had experience of neonatal  
10 resuscitation in the delivery room when the baby's father was present. No exclusion  
11 criteria were identified. Participants were recruited using a range of strategies:  
12 posters inviting HCPs to take part were displayed in various locations within the  
13 maternity unit and NNU; HCP meetings were attended to discuss the study and  
14 information leaflets were distributed in the delivery suite and NNU. Some participants  
15 also recommended other HCPs. In accordance with the critical incident approach  
16 (21), recruitment continued until a range of HCPs who had encountered a variety of  
17 experiences was recruited (22).  
18  
19  
20  
21  
22  
23  
24  
25  
26  
27  
28  
29  
30  
31  
32  
33  
34  
35

36 Forty-nine HCPs were approached about or volunteered to take part in the study. Six  
37 HCPs subsequently decided not to take part (2 midwives and 4 neonatal nurses).  
38 Another six said they would participate but staff shortages and workload issues  
39 meant that the interview did not take place (2 midwives, 2 neonatal nurses, 1  
40 paediatrician and 1 obstetrician). The final sample consisted of 37 HCPs including  
41 midwives, obstetricians, anaesthetists, neonatal nurse practitioners, neonatal nurses  
42 and paediatricians. The sample included participants with diverse clinical  
43 backgrounds and experience (23) (Table 1). The participants were from a range of  
44 ethnic backgrounds corresponding to the main groups represented in the study site's  
45 local population. Detail regarding the participants' ages and ethnicity have not been  
46  
47  
48  
49  
50  
51  
52  
53  
54  
55  
56  
57  
58  
59  
60

1  
2  
3 included to safeguard participant anonymity. Neonatal nurses were recruited  
4  
5 because this part of the study also explored HCPs' experiences of the father's first  
6  
7 visit to his baby on the NNU (not reported here). All the neonatal nurses who  
8  
9 participated in this phase of the study, regularly attended delivery suite to support  
10  
11 other staff during newborn resuscitation.  
12

## 13 14 15 16 **INTERVIEWS**

17  
18 Semi-structured, qualitative interviews were undertaken using Flanagan's critical  
19  
20 incident approach (21). Participants were asked to select an incident involving  
21  
22 newborn resuscitation in the delivery room when they and the baby's father had  
23  
24 been present. The intention was to explore the HCP's interpretation of the father's  
25  
26 experience. Participants described what happened and how those present,  
27  
28 particularly the father, responded (22,24). Some chose to describe incidents that had  
29  
30 occurred within the previous week, whilst others selected events that had occurred  
31  
32 several months ago. The interviewer (MH) used key questions and follow-up  
33  
34 questions to facilitate the description of events and to explore HCP perceptions and  
35  
36 feelings. The use of the follow-up or probing questions varied according to the  
37  
38 participant's initial response. In some instances HCPs began by talking about the  
39  
40 mother or the parents collectively. However, subsequent probing questions  
41  
42 encouraged them to focus their account on the father. This flexible approach  
43  
44 enabled HCPs to describe what happened and their feelings in their own words  
45  
46 (25,26). In order to ensure a range of scenarios were explored, participants were  
47  
48 asked to describe two contrasting incidents (27,28). The interviews ranged between  
49  
50 22 and 78 minutes (mean 48 minutes). Participants were interviewed in a private  
51  
52 room within the Hospital. Most of the interviews took place on weekday afternoons  
53  
54  
55  
56  
57  
58  
59  
60

1  
2  
3 within the HCP's working day. With participant informed consent, the interviews were  
4  
5 tape-recorded to enable verbatim transcription and data analysis. Five HCPs  
6  
7 (midwives and neonatal nurses) cried as they recalled the resuscitation and on two  
8  
9 occasions, the recording was temporarily stopped. At the end of the interview, all  
10  
11 participants were given a debriefing sheet identifying possible sources of support. In  
12  
13 accordance with qualitative methods; data collection, transcription and data analysis  
14  
15 were carried out concurrently (26,29). The study was approved by the Solihull Local  
16  
17 Research Ethics Committee (05/Q2706/104). University and trust approvals were  
18  
19 also obtained. All participants gave informed consent immediately before the  
20  
21 interview.  
22  
23  
24  
25  
26

## 27 ANALYSIS

28  
29  
30  
31  
32 The first author transcribed the interviews and undertook preliminary data analysis.  
33  
34 The transcriptions were read and reread in order to facilitate understanding.  
35  
36 Thematic analysis was then undertaken whereby the first transcript was coded into  
37  
38 themes. Subsequent transcripts were then analysed and additional themes or sub-  
39  
40 themes were generated when the data captured something new. The software  
41  
42 package 'NVivo 7' was used to facilitate this process as it enables the researcher to  
43  
44 identify relationships between the themes (30). During this stage, the development of  
45  
46 the thematic framework was undertaken in consultation with the second author. Data  
47  
48 collection continued until no new themes were identified during data analysis (data  
49  
50 saturation) (25,31). The thematic framework was then reviewed and revised by both  
51  
52 authors until the final framework was agreed.  
53  
54  
55  
56  
57  
58  
59  
60

## RESULTS

Analysis of the data generated four themes, each of which contained subthemes: 'whose role?' 'saying and doing,' 'teamwork' and 'impact on me.' These themes are described and illustrated with a direct quotation that represents the participants' responses. Whilst the focus of the study was the experiences of fathers, a range of quotes have been utilised to demonstrate the extent to which participants also referred to the parents or the mother.

### Whose role?

This theme focuses on whose role it was to support the father during and after the resuscitation. In the events described no-one exclusively took on these roles and no-one was delegated to do so. This was because HCP attention was focused on delivering care to the mother and/or baby (Table 2 – 2.1). Whilst representatives of all HCP groups felt the midwife was the most appropriate person to support and communicate with the father, they acknowledged that she had other responsibilities at the time (Table 2 – 2.2). Verbal communication with the parents during the resuscitation was in most cases directed towards the mother. Participants thought this was appropriate because unlike the father, most mothers could not see what was happening. In addition, HCPs believed that fathers could hear what was being said. Consequently fathers received limited direct information and support and this was generally only given on an 'ad hoc' basis.

1  
2  
3  
4  
5 Any information that was given to fathers during the resuscitation was usually  
6 provided by an anaesthetist or midwife. This was most commonly general  
7 information because they did not feel it was their responsibility to give more detail at  
8 this time. On occasions when the resuscitation was prolonged neonatal nurses  
9 sometimes described going over to the parents / mother to explain what was  
10 happening when the baby's condition had been stabilised (Table 2 – 2.3). Once  
11 resuscitation was completed some babies required NNU admission whilst others  
12 remained with their parents. Paediatricians, neonatal nurse practitioners and  
13 neonatal nurses described speaking to the parents at this time. However, midwives  
14 also recalled advocating for parents by prompting paediatricians to speak to parents  
15 before they left the delivery room.  
16  
17  
18  
19  
20  
21  
22  
23  
24  
25  
26  
27  
28  
29  
30  
31

32 All HCP groups discussed whether they debriefed the fathers after the resuscitation.  
33 Most midwives described attempting to speak to the father by himself to explain what  
34 had happened and correct misunderstandings. However, in many instances this was  
35 not possible because of other demands or lack of opportunity. Anaesthetists and  
36 obstetricians did not feel it was part of their role to debrief fathers and although  
37 paediatricians, neonatal nurse practitioners and neonatal nurses recalled instances  
38 when they had done this, the discussion was usually initiated by the father days or  
39 weeks later, when the baby was being cared for in the NNU. Many of the  
40 participants were reluctant to get involved in these discussions particularly neonatal  
41 nurses who had been present during the resuscitation (Table 2 – 2.4). They felt  
42 uncomfortable discussing events particularly if they thought the father would become  
43  
44  
45  
46  
47  
48  
49  
50  
51  
52  
53  
54  
55  
56  
57  
58  
59  
60

1  
2  
3 distressed. They were also concerned about being asked questions they could not  
4  
5 answer.

6  
7 Almost all participants were aware that other specialties have implemented WR  
8  
9 strategies to support relatives who are present during the resuscitation of a family  
10  
11 member. Whilst participants felt that these strategies would be of benefit to fathers,  
12  
13 they felt these were unlikely to be implemented due to staff shortages and a lack of  
14  
15 resources (Table 2 – 2.5).  
16  
17

### 20 21 **Saying and doing**

22  
23 This theme focuses on the HCPs' reflection on factors that influenced what they said  
24  
25 to fathers and the ways they supported them during and after the resuscitation.  
26

27 Anaesthetists and midwives acknowledged that they usually only gave fathers  
28  
29 general information during the resuscitation because they were uncertain what was  
30  
31 happening or how the baby was responding. However, they tried to say something  
32  
33 positive such as commenting on the amount or colour of the baby's hair.  
34  
35

36  
37  
38 When paediatricians, neonatal nurse practitioners and neonatal nurses spoke to  
39  
40 parents after the resuscitation the information given varied, ranging from detailed  
41  
42 information to a more general summary of events. Needing to get the baby to the  
43  
44 NNU as quickly as possible appeared to influence the nature and extent of  
45  
46 information given. Consequently parents whose baby required more extensive  
47  
48 resuscitation were often given the least amount of information.  
49  
50

51  
52  
53  
54 Being able to draw on previous experience and background knowledge was felt to be  
55  
56 invaluable. However, most participants had not received any education or training  
57  
58  
59  
60



1  
2  
3 about communicating with fathers, either generally or in specific situations such as  
4  
5 newborn resuscitation. HCPs in senior posts also said they did not address these  
6  
7 issues when teaching juniors (Table 3 – 3.1). Midwives who had trained more  
8  
9 recently had received some teaching about supporting fathers in general, but this  
10  
11 was minimal. All HCPs felt their way of supporting and communicating with fathers  
12  
13 had evolved through experience. Some midwives and anaesthetists felt they had  
14  
15 become skilled at observing non-verbal cues portrayed by fathers and this enabled  
16  
17 them to support them more effectively. Other HCPs drew on experience in related  
18  
19 specialties, taking personal responsibility for their own learning, discussions with  
20  
21 fathers and reflection on their practice (Table 3 – 3.2).  
22  
23  
24  
25  
26

27  
28 In developing their ways of supporting and communicating with fathers, HCPs said  
29  
30 they drew on two other elements: observing the practice of others and thinking about  
31  
32 how they would like to be treated. They described learning from mentors, senior  
33  
34 colleagues, their peers or junior staff, and recalled both positive and negative  
35  
36 scenarios (Table 3 – 3.3). Obstetricians often specifically mentioned learning good  
37  
38 practice from midwives. Several HCPs used the phrase “putting yourself in their  
39  
40 shoes.” Female HCPs modified this approach to thinking about how they would like  
41  
42 their partner to be treated (Table 3 – 3.4). Despite the various strategies developed  
43  
44 over time all HCP groups said they often did not know what to say to fathers during  
45  
46 prolonged episodes of resuscitation (Table 3 – 3.5).  
47  
48  
49  
50

## 51 **Teamwork**

52  
53  
54 When thinking about factors that may have impacted on the father’s, participants  
55  
56 identified the importance of effective teamwork and inter-professional working during  
57  
58  
59  
60

1  
2  
3 the resuscitation. They felt that when the team worked well together, the situation  
4  
5 was usually dealt with quickly and smoothly to the benefit of all concerned, including  
6  
7 the father. Senior HCPs described having an 'instinctive' way of working with their  
8  
9 colleagues such that verbal communication was not required. They described  
10  
11 scenarios when those present spontaneously took on different roles and  
12  
13 responsibilities assisting and supporting each other (Table 4 – 4.1). Obstetricians  
14  
15 and anaesthetists recalled distracting the father so that he could not see what was  
16  
17 happening and to reduce the risk of him hindering the resuscitation in any way. This  
18  
19 approach enabled their colleagues to focus on the resuscitation and none of the  
20  
21 fathers intervened with the resuscitation in the incidents described. Anaesthetists  
22  
23 also described assisting with the resuscitation, particularly when a junior  
24  
25 paediatrician was having difficulty intubating the baby. Several midwives described  
26  
27 responding to a crash call. They often took on the role of 'go-between,' relaying  
28  
29 information between the neonatal and obstetric teams and the parents. The  
30  
31 importance of senior HCPs supporting junior staff was also identified (Table 4 – 4.2).  
32  
33  
34  
35  
36  
37

### 38 **Impact on me**

39  
40  
41  
42  
43 Whilst the intention of this study was to explore the HCP's interpretation of the  
44  
45 father's experience, the HCPs frequently reflected on the impact of the events they  
46  
47 described on themselves. During the resuscitation, HCPs described trying to adopt a  
48  
49 calm and self-assured manner regardless of how they were feeling. They hoped this  
50  
51 attitude would be transmitted to the father and as a consequence, he would be  
52  
53 comforted and reassured. Many midwives however, said it was difficult to adopt this  
54  
55 approach and when recounting specific events described them as being "awful",  
56  
57  
58  
59  
60

1  
2  
3 “horrendous”, “terrible” and “shocking.” In a less extreme way, when they reflected  
4 on specific events, several midwives felt they should have done more to support the  
5 father (Table 5 – 5.1).  
6  
7  
8  
9

10  
11  
12 Another issue some paediatricians and the neonatal nurse practitioners talked about  
13 was when the father approached the resuscitaire during the resuscitation. The  
14 neonatal nurse practitioners and some of the more senior paediatricians were  
15 comfortable with this and felt it did not impact on their practice in a negative way  
16 (Table 5 – 5.2). Others however, felt uneasy being watched so closely and felt it  
17 placed additional stress on them in an already pressurised situation (Table 5 – 5.3).  
18  
19  
20  
21  
22  
23  
24  
25  
26

27  
28 The HCPs rarely said the events they described had a positive impact on them. Their  
29 relief and satisfaction when all was well was usually implied rather than stated. This  
30 may be because in many cases, the busy nature of the care setting meant that they  
31 often quickly became involved in the care of other parents and babies with limited  
32 opportunity to reflect on what had happened. Midwives were the only HCPs who  
33 described becoming emotional when the resuscitation was successful. This is  
34 probably because in most cases they had been directly involved in the couple’s care  
35 during labour.  
36  
37  
38  
39  
40  
41  
42  
43  
44  
45  
46

## 47 **DISCUSSION**

48  
49  
50  
51  
52 This is the first known reported study to explore the experiences and perceptions of  
53 HCPs involved in neonatal resuscitation in the delivery room when the baby’s father  
54 was present. The interviews provide strong evidence of HCPs’ perspectives of this  
55  
56  
57  
58  
59  
60

1  
2  
3 type of scenario. Although all HCP groups said the fathers needed support and  
4 information during the resuscitation, it was acknowledged these needs were almost  
5 always unmet. This confirms a finding from an earlier phase of the broader study  
6 (12). HCPs felt this was because their priorities at the time were the health of the  
7 baby or the mother. A view also shared by fathers in an earlier phase of this study  
8 (12). Although HCPs thought the midwife was probably best placed to support the  
9 father it was acknowledged that that she had a duty of care to the mother and was  
10 often involved in her ongoing care. A key factor in the failure to meet the needs of  
11 fathers appeared to be that none of the professional groups involved had direct  
12 responsibility to support and communicate with him. It was frequently stated that “he  
13 wasn’t my patient” or “that’s not part of my role.”  
14  
15  
16  
17  
18  
19  
20  
21  
22  
23  
24  
25  
26  
27  
28

29 Most HCPs were aware that in other care settings a designated HCP often supports  
30 relatives when they witness resuscitation events (14,32,33). The role of the  
31 chaperone is to explain what is happening and to support, reassure, and de-brief the  
32 relative. They can also intervene if the relative’s behaviour becomes distracting  
33 (20,32). This role is generally undertaken by a senior HCP, usually a nurse, who can  
34 provide appropriate information and support (32). Whilst the HCPs suggested a  
35 chaperone would be beneficial for fathers, it was felt staff shortages and lack of  
36 resources would prevent this from happening.  
37  
38  
39  
40  
41  
42  
43  
44  
45  
46  
47  
48

49 The HCPs identified a number of factors that could have added to what would have  
50 already been a difficult experience for fathers. These factors included a lack of direct  
51 information at key points and situations where fathers were excluded or  
52 marginalised. Many HCPs also described the impact of events on them and aspects  
53  
54  
55  
56  
57  
58  
59  
60

1  
2  
3 they found difficult. An issue that frequently occurred was what to say during  
4  
5 prolonged resuscitation. Experienced HCPs as well as those who had been working  
6  
7 in the specialty for a short time identified this difficulty. The more acute distress  
8  
9 displayed by midwives and neonatal nurses during the interviews was most  
10  
11 commonly because they felt the situation was not handled well and they felt culpable  
12  
13 to some extent. Obstetricians, anaesthetists and paediatricians were more 'matter-  
14  
15 of-fact' about what happened and did not appear to feel responsible when a father's  
16  
17 needs were not met. However, paediatricians described their discomfort when  
18  
19 fathers came to the resuscitator. This may indicate a lack of confidence in their ability  
20  
21 or their recognition that the presence of the father can cause additional pressure at  
22  
23 an already stressful time. This was explored in the early literature regarding WR in  
24  
25 other care settings such as adult and paediatric intensive care and accident and  
26  
27 emergency departments which reports that HCPs felt WR would have a negative  
28  
29 impact on them (14,17,18). However, over time HCPs who have been exposed to  
30  
31 WR have found ways to accommodate it in their practice.  
32  
33  
34  
35  
36  
37

38  
39 Guidance about supporting parents in the delivery room is given in the recently  
40  
41 updated European and UK newborn life-support training programmes, mainly in  
42  
43 relation to communicating with parents before, during and after the event (34,35).  
44  
45 However, no specific guidance is given about ways to communicate with or ways to  
46  
47 support the father. This would appear to be an area worthy of development given the  
48  
49 lack of confidence that some HCPs expressed about communicating with fathers  
50  
51 during resuscitation events, particularly when the resuscitation was prolonged.  
52  
53  
54

## 55 56 **STRENGTHS AND LIMITATIONS** 57 58 59 60

1  
2  
3 The study's strengths and limitations are acknowledged:  
4  
5  
6

- 7
- 8 • The critical incident approach was generally an appropriate way to explore  
9 HCPs' experiences of specific events. This approach enabled many of them  
10 to consider the impact of newborn resuscitation on fathers for the first time.  
11  
12
  - 13 • Some participants found focusing on issues pertaining to the father more  
14 difficult and sometimes talked about the mother or the parents collectively.  
15 However, subsequent probing questions encouraged them to concentrate on  
16 the father.  
17  
18
  - 19 • Some participants chose to describe events that occurred a while ago. It is  
20 therefore difficult to determine the extent to which recall bias influenced their  
21 descriptions. However, they appeared to have no difficulty remembering their  
22 feelings or what happened. They were often surprised at how clearly they  
23 could recall the event.  
24  
25
  - 26 • Incidents where the baby did not survive were not described. HCPs may have  
27 thought the researchers were only interested in events where the baby  
28 survived, although this was not stated by the interviewer. Alternatively, they  
29 may have deliberately elected not to recall an incident that they thought might  
30 be too sensitive or potentially controversial to discuss.  
31  
32
  - 33 • Whilst the preliminary data analysis was undertaken by the first author, the  
34 thematic framework was discussed with the second author as it was  
35 developed and the final framework was agreed by both authors.  
36  
37  
38  
39  
40  
41  
42  
43  
44  
45  
46  
47  
48  
49  
50  
51

52  
53  
54 Although undertaken in one setting, the findings from this independent study provide  
55 insight to the experiences and perceptions of HCPs and the context in which the  
56  
57  
58  
59  
60

1  
2  
3 resuscitation events occurred (25). Given the qualitative nature of this study, it is  
4  
5 inappropriate to generalize the findings to the wider population. However, in  
6  
7 accordance with the notion of transferability, the findings of this study have  
8  
9 highlighted issues that may be of relevance in other settings (23). To gain a broader  
10  
11 view of HCPs' experiences and the longer term impact, this study could be replicated  
12  
13 with larger groups of HCPs. It would also be valuable to explore the experiences of  
14  
15 HCPs where the baby did not survive the resuscitation. Although such a study would  
16  
17 present challenges, it would have the potential to provide insight to situations that  
18  
19 could have profound and possibly long lasting effects on HCPs. This in turn could  
20  
21 influence the provision of HCP education, training and support in the future.  
22  
23  
24  
25

## 26 27 **IMPLICATIONS FOR PRACTICE**

28  
29  
30  
31  
32 To some extent newborn resuscitation is part of the normal working day for many  
33  
34 HCPs involved in perinatal care. However, some midwives and neonatal nurses  
35  
36 became distressed when discussing events some of which occurred some time ago  
37  
38 and yet remained a strong memory. This suggests there is a need for greater  
39  
40 recognition of the impact of resuscitation events on HCPs. The provision of  
41  
42 opportunities for formal and informal reflection on practice, debriefing and support  
43  
44 could be more extensive.  
45  
46  
47  
48

49  
50 The HCPs were generally aware of the needs of fathers during and after newborn  
51  
52 resuscitation. However, a number of difficulties and challenges affected how they  
53  
54 supported and communicated with fathers. Whilst there is increasing evidence  
55  
56 pertaining to the needs of fathers, in maternity care, HCPs generally focus on the  
57  
58  
59  
60

1  
2  
3 needs of mothers and babies (36); duty of care and professional responsibilities  
4  
5 determine this. Nevertheless, it would appear that there is scope for much more  
6  
7 extensive HCP education and training about supporting and communicating with  
8  
9 fathers around the time of newborn resuscitation. The allocation of resources to  
10  
11 support the provision of a chaperone for fathers during resuscitation would also be  
12  
13 worthy of consideration by service providers (14,20).  
14  
15

## 16 17 18 **ACKNOWLEDGEMENTS**

19  
20  
21  
22  
23 We would like to thank the health care professionals who participated in this study  
24  
25 and were willing to share their experiences so readily.  
26  
27

## 28 29 **COMPETING INTERESTS**

30  
31  
32  
33  
34 Both authors have completed the Unified Competing Interest form at  
35  
36 [http://www.icmje.org/coi\\_disclosure.pdf](http://www.icmje.org/coi_disclosure.pdf) (available on request from the corresponding  
37  
38 author) and declare: no support from any organisation for the submitted work; no  
39  
40 financial relationships with any organisations that might have an interest in the  
41  
42 submitted work in the previous three years, no other relationships or activities that  
43  
44 could appear to have influenced the submitted work.  
45  
46  
47  
48

## 49 **DATA SHARING**

50  
51  
52  
53  
54 No additional data available.  
55  
56  
57  
58  
59  
60



## FUNDING

Development and approval of the study, participant recruitment, data collection and initial data analysis were undertaken when the first author held the Bliss Neonatal Nurse Research Fellow post at the National Perinatal Epidemiology Unit, University of Oxford. The first author's PhD fees were met by Birmingham City University and the first author. All other expenses were met by the first author. Aston University was the sponsor. This included providing University approval for the study and ensuring the study was carried out in accordance with the Research Governance Framework.

## AUTHORS' CONTRIBUTIONS

Dr M.E Harvey (MH) developed and designed the research proposal, negotiated access to the study-site, obtained the required approvals, recruited participants, conducted the interviews, undertook the data analysis and wrote the first draft of this paper. Professor HM Pattison (HP) supervised MH throughout the study, reviewed and agreed the coding framework, contributed to and has agreed the final version of the paper. MH is the guarantor.

The Corresponding Author has the right to grant on behalf of all authors and does grant on behalf of all authors, an exclusive licence on a worldwide basis to the BMJ Publishing Group Ltd and its Licensees to permit this article (if accepted) to be

1  
2  
3 published in BMJ editions and any other BMJ PGL products and sub-licences to  
4  
5 exploit all subsidiary rights, as set out in our licence.  
6

## 7 REFERENCES

- 8  
9  
10  
11 1. World Health Organization. *Fatherhood and Health Outcomes in Europe*.  
12 World Health Organization: Copenhagen 2007  
13
- 14  
15  
16  
17 2. Klaus MH, Kennell JH. *Parent-Infant Bonding*. Second edition. CV Mosby: St.  
18 Louis MO 1982  
19
- 20  
21  
22  
23 3. Ramchandani P, Stein A, Evans J, et al. Paternal depression in the postnatal  
24 period and child development: a prospective population study *Lancet*.  
25 2005;365:2201-2205  
26
- 27  
28  
29  
30 4. Department of Health, Department for Education and Skills. *National Service*  
31 *Framework for children, young people and maternity services – Maternity*  
32 London: Department of Health 2004  
33
- 34  
35  
36  
37 5. Burgess A. *Maternal and infant health in the perinatal period: the father's role*  
38 The Fatherhood Institute: Abergavenny 2008  
39
- 40  
41  
42  
43 6. Shribman S. *Making it Better: For Mother and Baby* Department of Health:  
44 London 2007  
45
- 46  
47  
48  
49 7. Kiernan K, Smith K. Unmarried Parenthood: New Insights from the Millennium  
50 Cohort Study. *Popul Trends*. 2003;26-33  
51
- 52  
53  
54  
55 8. TNS System Three. *NHS Maternity Services Quantitative Research*.  
56 Edinburgh: TNS System Three 2005;44-57  
57  
58  
59  
60

- 1  
2  
3 9. Murthy V, Rao N, Fox GF, et al. Survey of UK newborn resuscitation  
4  
5 practices. *Arch Dis Child Fetal Neonatal Ed.* 2012;97:F154-5  
6  
7
- 8  
9  
10 10. Fulbrook P, Latour JM, Albarra, JW. Paediatric critical care nurses' attitudes  
11  
12 and experiences of parental presence during cardiorespiratory resuscitation:  
13  
14 A European survey. *Int J Nurs Stud.* 2007;44:1238-1249  
15  
16
- 17  
18 11. Perry SE. Support for parents witnessing resuscitation: nurse perspectives.  
19  
20  
21 *Paed Nurs.* 2009;21:26-31  
22  
23
- 24  
25 12. Harvey ME, Pattison HM, Being there: a qualitative interview study with  
26  
27 fathers present during the resuscitation of their baby at delivery. *Arch Dis*  
28  
29 *Child Fetal Neonatal Ed.* 2012;97:F439-F443  
30  
31
- 32  
33 13. Sacchetti A, Carraccio C, Leva E, et al. Acceptance of family member  
34  
35 presence during pediatric resuscitations in the emergency department: Effects  
36  
37 of personal experience. *Pediatr Emerg Care.* 2000; 16:85-87  
38  
39
- 40  
41 14. Grice AS, Picton P, Deakin CDS. Study examining attitudes of staff,  
42  
43 paediatrics and relatives to witnessed resuscitation in adult intensive care  
44  
45 units. *Br J Anaesth.* 2003;91:820-824  
46  
47  
48
- 49  
50 15. Fulbrook P, Albarran JW, Latour JM. A European survey of critical care  
51  
52 nurses' attitudes and experiences of having family members present during  
53  
54 cardiorespiratory resuscitation *Int J Nurs Stud.* 2005;42:557-568  
55  
56  
57  
58  
59  
60

- 1  
2  
3  
4  
5 16. McGahey PR. Family presence during pediatric resuscitation: focus on staff  
6  
7 *Critic Care Nurs.* 2002;22:29-34  
8  
9  
10  
11  
12 17. Schilling RJ. Should relatives watch resuscitation? – No room for spectators  
13  
14 *BMJ.* 1994;309:406  
15  
16  
17  
18 18. MacLean SL, Guzzetta CE, White C, et al. Family presence during  
19  
20 cardiopulmonary resuscitation and invasive procedures: practices of critical  
21  
22 care and emergency nurses *Am J Crit Care.* 2003;12:246- 257  
23  
24  
25  
26  
27 19. American Academy of Pediatrics. Family-Centred Care and the Pediatricians  
28  
29 Role *Pediatrics.* 2003;112:691-696  
30  
31  
32  
33  
34 20. Baskett PJF, Steen PA, Bossaert L. European Resuscitation Council  
35  
36 Guidelines for Resuscitation 2005 - Section 8. The ethics of resuscitation and  
37  
38 end-of-life decisions *Resuscitation.* 2005;67:S171-S180  
39  
40  
41  
42 21. Flanagan JC. The critical interview technique *Psychology Bulletin.*  
43  
44 1954;51:327-358  
45  
46  
47  
48 22. Broström A, Strömberg A, Dahlström U, et al. Congestive heart failure,  
49  
50 spouses' support and the couple's sleep situation: a critical incident technique  
51  
52 analysis *J Clin Nurs.* 2003;12: 223-233  
53  
54  
55  
56  
57  
58  
59  
60

- 1  
2  
3 23. O'Leary Z. *The Essential Guide to Doing Research*. London: Sage  
4  
5 Publications 2004  
6  
7  
8  
9  
10 24. Sharoff L. Critique of the critical incident technique *J Res Nurs*. 2008;13:301-  
11  
12 309  
13  
14  
15  
16 25. Pope C, Campbell R. Qualitative research in obstetrics and gynaecology. *Brit*  
17  
18 *J Obstet Gynaec*. 2001;108:233-237  
19  
20  
21  
22  
23 26. Kvale S, Brinkmann S. *Interviews: Learning the Craft of Qualitative Research*  
24  
25 *Interviewing*. Second edition. Los Angeles: Sage 2009  
26  
27  
28  
29  
30  
31 27. Robson C. *Real world research*. Third edition. Oxford: Blackwell Publishing  
32  
33 2012  
34  
35  
36  
37  
38 28. Silvester J. Work and Organizational Psychology in Willig C, Stainton-Rogers  
39  
40 W. *The Sage Handbook of Qualitative Research in Psychology*. London:  
41  
42 Sage Publications 2008  
43  
44  
45 29. Pope C, Ziebland S, Mays N. Analysing qualitative data. *BMJ*. 2000;320:114-  
46  
47 116  
48  
49  
50 30. Lewins A, Silver C. *Using software in qualitative research*. London: Sage  
51  
52 Publications 2007  
53  
54  
55  
56  
57  
58  
59  
60

- 1  
2  
3 31. Malterud K. Qualitative research: standards, challenges and guidelines.  
4  
5 *Lancet*. 2001;358:483-488  
6  
7  
8  
9  
10 32. Goldstein A, Berry K, Callaghan A. Resuscitation witnessed by relatives has  
11  
12 proved acceptable to doctors in paediatric cases. *BMJ*. 1997;314:144-145  
13  
14  
15  
16 33. Robinson SM, Mackenzie-Ross S, Campbell Hewson GL, et al. Psychological  
17  
18 effect of witnessed resuscitation on bereaved relatives. *Lancet*.  
19  
20 1998;352:614-617  
21  
22  
23  
24  
25 34. Nolan JP, Soar J, Zideman DA, et al European Resuscitation Council  
26  
27 Guidelines for Resuscitation 2010 Section1. Executive summary.  
28  
29 *Resuscitation*. 2010;81:1219-1276  
30  
31  
32  
33  
34 35. Resuscitation Council. *Resuscitation at birth*. Third edition. London:  
35  
36 Resuscitation Council (UK) 2011  
37  
38  
39  
40  
41 36. McVeigh CA, Baafi M, Williamson M. Functional status after fatherhood: An  
42  
43 Australian study. *J Obstet Gynecol Neonatal Nurs*. 2002;31:165-171  
44  
45  
46  
47  
48  
49  
50  
51

| HCP Group | No. | Sex | Time from initial qualification | Length of time in current post |
|-----------|-----|-----|---------------------------------|--------------------------------|
|           |     |     |                                 |                                |

|                              |    |                    |              |                      |
|------------------------------|----|--------------------|--------------|----------------------|
| Midwives                     | 12 | Female*            | 1 – 29 years | 6 months – 5 years   |
| Neonatal nurses              | 10 | Female*            | 2 – 32 years | 6 months – 23 years  |
| Neonatal nurse practitioners | 2  | Female*            | 7 – 19 years | 6 months – 7 years   |
| Obstetricians                | 3  | Female             | 9 – 22 years | 1 – 6 years          |
| Anaesthetists                | 4  | 2 Female<br>2 Male | 6 – 16 years | 1 – 6 years          |
| Paediatrician                | 6  | 1 Female<br>5 male | 2 – 33 years | 2½ months – 18 years |

\*No males were employed in this role during the period of recruitment

Table 1 Participant biographical details

**Table 2** Whose role?

2.1 *“My main focus is the mother. I think that’s, I think it’s important to understand that because the mother’s my patient, the father’s not my*

---

*patient.” (Anaesthetist14)*

2.2 *“When the baby was born and she needed resuscitating, he ran out the room crying. I felt like I should have ran after him really which I couldn’t at the time because I was trying to like stop her ((the mother)) from bleeding. So it was difficult but I did think, oh my God.” (Midwife9)*

2.3 *“I at that time, I could not speak to dad because we, our priority was the baby and baby needed intubating. Once that was done I was able to then go and speak to mum just to give her brief information of what was going on, how the baby was.” (NeonatalNurse1)*

2.4 *“It’s not my place, just in case he asked me sensitive questions that I’m not able to answer. It’s very difficult in that situation especially if you’ve got a very sick baby. I would not take part in that at all.” (NeonatalNurse5)*

2.5 *“There’s no-one specifically to do that, unless we employed an extra member of staff just to look after the father, but we can’t do that.” (Anaesthetist13)*

---



---

**Table 3** **Saying and doing**

---

3.1 *“I don’t think it’s anything that anybody’s spoken about and I suppose I don’t really speak to the trainees who come through about it either.”*



- 
- 1  
2  
3 (Paediatrician16)  
4  
5  
6 3.2 *"I think my practice is probably based on what I've heard husbands and*  
7 *partners tell me and how they felt."* (Midwife15)  
8  
9  
10  
11 3.3 *"I have a series of horror stories of observing my consultant teachers in*  
12 *days of yore making a complete and utter hash of it. And I use that you*  
13 *know and I just, you just learn by thinking, right, if I live a thousand*  
14 *years, I will never do that."* (Paediatrician15)  
15  
16  
17  
18  
19 3.4 *"I always say, speak to people how you would want to be spoken to.*  
20 *Treat them the way you want to be treated and just put yourself in their*  
21 *situation. You know, it's your partner, that's your baby and somebody's*  
22 *not even acknowledging that you're there, how would that make you*  
23 *feel?"* (Obstetrician61)  
24  
25  
26  
27  
28  
29 3.5 *"It was awful. No-one was saying anything and mum was crying. I was*  
30 *just thinking please, please somebody say something."*  
31  
32 (NeonatalNurse7)  
33  
34  
35  
36  
37  
38  
39  
40  
41  
42  
43  
44  
45  
46  
47  
48  
49  
50  
51  
52  
53
- 

54 **Table 4 Teamwork**

- 
- 56 4.1 *"If I'm happy the mother's suturing is done and mum's not bleeding,*  
57  
58  
59  
60

---

1  
2  
3 *mum's fine and everybody is working on the baby then I will stay and*  
4 *do whatever I can whether it's fetching for the paediatrician or whether*  
5 *it's staying and supporting mum and dad because the midwife's*  
6 *helping the paediatrician." (Obstetrician10)*  
7  
8  
9

10  
11 4.2 *"It's like yesterday the shoulder dystocia, the baby needed to be*  
12 *resuscitated. Me and the Shift Leader talked about it, like you know,*  
13 *you go over it like, oh that was awful and, oh he ((the father)) was*  
14 *crying, oh it was terrible and you just talk about it and then that helps*  
15 *you to kind of deal with what's happened." (Midwife9)*  
16  
17  
18  
19  
20

---

21  
22  
23  
24  
25  
26  
27  
28  
29  
30  
31  
32  
33  
34  
35  
36  
37  
38  
39  
40  
41  
42  
43  
44  
45  
46  
47  
48  
49  
50  
51  
52  
53  
54 **Table 5** **Impact on me**

---

55  
56 5.1 *"You try and support the fathers and meet their needs when it*  
57  
58  
59  
60

---

1  
2  
3 *happens. I do have days where I go home deflated thinking I really*  
4 *wish I could have done more for him that day.” (Midwife12)*  
5  
6

7  
8 5.2 *“I don’t mind it at all. I’m used to people watching what I do and I think*  
9 *he needs to see anyway.” (NeonatalNursePractitioner14)*  
10

11  
12  
13 5.3 *“I don’t like it. Not because it’s a worry to me it’s just because I don’t*  
14 *happen to like being watched when I’m working.” (Paediatrician7)*  
15

16  
17  
18 5.4 *“Yes. Even now, after all this time, there are some difficult deliveries*  
19 *and you want to, you share in all of that emotion and it’s very easy to*  
20 *kind of get prickly eyes when the baby is ok.” (Midwife7)*  
21  
22  
23

---

1  
2  
3  
4  
5  
6  
7 **The impact of a father's presence during newborn resuscitation: a qualitative**  
8 **interview study with health care professionals**  
9

10  
11  
12  
13  
14 Meryll E Harvey, Helen M Pattison  
15

16  
17  
18  
19  
20 Meryll E Harvey senior academic Faculty of Health, Birmingham City University,  
21 Birmingham B15 3TN Helen M Pattison professor School of Life Health Sciences,  
22 Aston University B4 7ET  
23  
24  
25  
26  
27  
28  
29  
30  
31  
32  
33  
34  
35  
36  
37  
38  
39  
40  
41  
42  
43  
44  
45  
46  
47  
48  
49  
50

51 Correspondence to: Dr Meryll E Harvey [meryll.harvey@bcu.ac.uk](mailto:meryll.harvey@bcu.ac.uk)  
52  
53  
54  
55  
56  
57  
58  
59  
60

1  
2  
3  
4  
5  
6  
7 **Objective:** To explore health care professionals' experiences around the time of  
8 newborn resuscitation in the delivery room, when the baby's father was present.

**Comment [M1]:** R2 – reworded to more accurately reflect purpose of study

9  
10 **Design:** A qualitative descriptive, retrospective design using the critical incident  
11 approach. Tape-recorded semi-structured interviews were undertaken with health  
12 care professionals involved in newborn resuscitation. Participants recalled  
13 resuscitation events when the baby's father was present. They described what  
14 happened and how those present, including the father, responded. They also  
15 reflected upon the impact of the resuscitation and the father's presence on  
16 themselves. Participant responses were analysed using thematic analysis.

**Comment [M2]:** R2 - added

17  
18  
19  
20  
21  
22 **Setting:** A large teaching hospital in the UK.

**Comment [M3]:** R2 – deleted from results section and added here

23  
24 **Participants:** Purposive sampling was utilised. It was anticipated that 35-40

**Comment [M4]:** R2 – information regarding participants moved to next section

25  
26  
27  
28  
29  
30  
31  
32 participants would be recruited. Forty-nine potential participants were invited to take  
33 part. The final sample consisted of 37 participants including midwives, obstetricians,  
34 anaesthetists, neonatal nurse practitioners, neonatal nurses and paediatricians.

**Comment [M5]:** R1 - Information added regarding anticipated / final sample size

35  
36  
37  
38 **Results:** Four themes were identified: 'whose role?' 'saying and doing' 'teamwork'  
39 and 'impact on me'. Whilst no-one was delegated to support the father during the  
40 resuscitation, midwives and anaesthetists most commonly took on this role.

41  
42  
43  
44  
45  
46  
47  
48  
49  
50 Participants felt the midwife was the most appropriate person support fathers. All  
51 health care professional groups said they often did not know what to say to fathers  
52 during prolonged resuscitation. Teamwork was felt to be of benefit to all concerned,  
53 including the father. Some paediatricians described their discomfort when fathers  
54 came to the resuscitaire. None of the participants had received education and  
55 training specifically on supporting fathers during newborn resuscitation.

56  
57  
58  
59  
60 **Conclusions** This is the first known study to specifically explore the experiences of  
health care professionals of the father's presence during newborn resuscitation. The

1  
2  
3  
4  
5  
6  
7 findings suggest the need for more focused training about supporting fathers. There  
8  
9 is also scope for service providers to consider ways in which fathers can be  
10 supported more readily during newborn resuscitation.  
11  
12  
13  
14  
15  
16  
17  
18  
19  
20  
21  
22  
23  
24  
25  
26  
27  
28  
29  
30  
31  
32  
33  
34  
35  
36  
37  
38  
39  
40  
41  
42  
43  
44  
45  
46  
47  
48  
49  
50  
51  
52  
53  
54  
55  
56  
57  
58  
59  
60

For peer review only

## ARTICLE SUMMARY

### Article Focus:

The research question for this study was; 'What are the experiences of health care professionals of the father's presence during newborn resuscitation in the delivery room?' To address this question, the objectives of this phase of the study were:

1. To conduct interviews utilising the critical incident approach with HCPs who had experience of newborn resuscitation when the baby's father was present.
2. To provide an account of the experiences of HCPs of newborn resuscitation when the baby's father was present.

### Key messages:

The key messages and significance of the study are:

1. Whilst the health care professionals were aware of the information and support needs of fathers during newborn resuscitation, they acknowledged that these needs were rarely met.
2. The health care professionals in this study had not received education and training specifically about supporting fathers during newborn resuscitation.
3. The health care professionals in this study did not utilize strategies to support fathers that are recommended when relatives are present during resuscitation events in other critical care settings.

**Strengths and limitations:**

**Comment [M6]:** Section amended to correlate with strengths and limitations section in main paper

- Although undertaken in one setting, the findings from this independent study provide insight to the experiences and perceptions of HCPs and the context in which the resuscitation events occurred
- The critical incident approach was generally an appropriate way to explore HCPs' experiences of specific events. This approach enabled many of them to consider the impact of newborn resuscitation on fathers for the first time.
- Some participants found focusing on issues pertaining to the father more difficult and sometimes talked about the mother or the parents collectively. However, subsequent probing questions encouraged them to concentrate on the father.
- Some participants chose to describe events that occurred a while ago. It is therefore difficult to determine the extent to which recall bias influenced their descriptions. However, they appeared to have no difficulty remembering their feelings or what happened. They were often surprised at how clearly they could recall the event.
- Incidents where the baby did not survive were not described. HCPs may have thought the researchers were only interested in events where the baby survived, although this was not stated by the interviewer. Alternatively, they may have deliberately elected not to recall an incident that they thought might be too sensitive or potentially controversial to discuss.
- Whilst the preliminary data analysis was undertaken by the first author, the thematic framework was discussed with the second author as it was developed and the final framework was agreed by both authors.



1  
2  
3  
4  
5  
6  
7  
8  
9  
10  
11  
12  
13  
14  
15  
16  
17  
18  
19  
20  
21  
22  
23  
24  
25  
26  
27  
28  
29  
30  
31  
32  
33  
34  
35  
36  
37  
38  
39  
40  
41  
42  
43  
44  
45  
46  
47  
48  
49  
50  
51  
52  
53  
54  
55  
56  
57  
58  
59  
60

- Given the qualitative nature of this study, it is inappropriate to generalize the findings to the wider population. However, in accordance with the notion of transferability, the findings of this study have highlighted issues that may be of relevance in other settings.

For peer review only

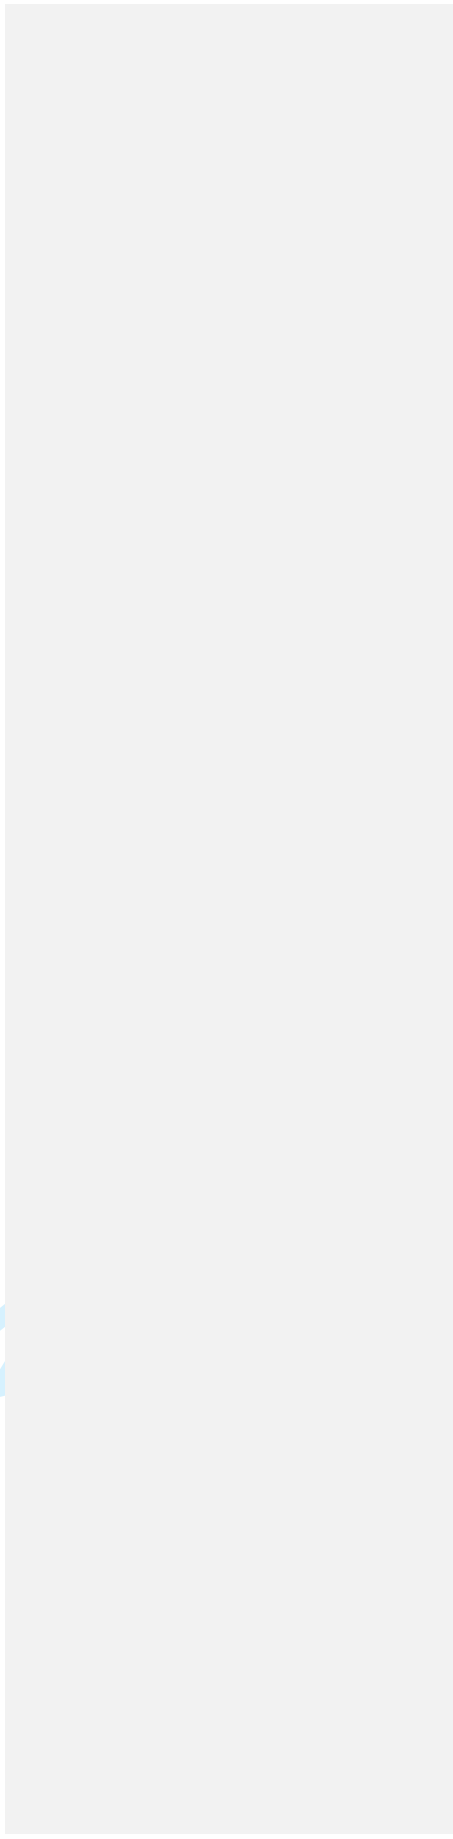

## INTRODUCTION

The birth of their child is often a landmark event for a father and can be an important episode in the on-going process of adaptation to parenthood. Short and more longer term benefits of a father's involvement in the life of his child have been described which can impact on the father, his partner, his baby and society more generally (1,2,3). As a consequence there has been a drive in the UK over the last 10 years to engage and involve fathers more readily, particularly during the perinatal period and during childbirth specifically (4,5,6). However, in order to ensure that fathers are appropriately supported during the perinatal period, it is important that health care professionals (HCPs) have insight to fathers' experiences and needs.

Whilst for the majority of men childbirth is straightforward, for others it is not.

When a newborn baby requires resuscitation in UK settings, the father will usually be present because most fathers attend the birth of their baby and delivery and resuscitation generally take place in the same room (7,8,9). Whilst some studies have investigated the impact on HCPs of parental presence during neonatal resuscitation in the neonatal unit (NNU) (10,11); the father's presence during newborn resuscitation in the delivery room has only been reported in terms of the impact on the father (12).

The experiences of HCPs of the presence of a relative during the resuscitation of a family member has been investigated in settings such as adult and paediatric intensive care and accident and emergency (13,14,15). Early 'witnessed resuscitation' (WR) research identified that many HCPs were not supportive of this approach (16). They were concerned that relatives would be unduly distressed or

**Comment [M7]:** R2 - Introduction amended and references added

**Comment [M8]:** R2 - clarification re: HCPs negative view of witnessed resuscitation

1  
2  
3  
4  
5  
6  
7 would be at risk of physical harm due to the nature of the environment. HCPs also  
8 felt WR would impinge on themselves and their practice in a negative way  
9 (14,17,18). However, despite some initial opposition, most HCPs now embrace the  
10 concept of WR and it has become accepted practice in many Western countries over  
11 the last two decades. This reflects a generally more open and inclusive approach to  
12 health care and recognition of the need to deliver family-centred care (19,20).  
13  
14  
15  
16  
17  
18  
19

20 The feelings and perceptions of HCPs' experiences and perceptions of the father's  
21 presence during newborn resuscitation in the delivery room do not appear to have  
22 been previously investigated. The aim of this part of a wider study (12) was to gain a  
23 broader understanding of fathers' experiences through HCPs' accounts of episodes  
24 of care. Participants also reflected on the ways in which the father's presence  
25 impacted on themselves and their practice. This paper focuses on the findings  
26 pertaining to the experiences of HCPs of a father's presence during newborn  
27 resuscitation.  
28  
29  
30  
31  
32  
33  
34  
35  
36  
37

## 38 METHOD

39  
40  
41 A qualitative descriptive, retrospective design was utilised using the critical incident  
42 approach (21).  
43  
44  
45

## 46 Participants

47  
48  
49 Purposive sampling was utilised to recruit participants from one large teaching  
50 hospital in the UK. It was anticipated that 35-40 participants would be required in  
51  
52  
53  
54  
55  
56  
57  
58  
59  
60

Comment [M9]: R2 – statement reworded

Comment [M10]: R2 – rationale for study

Comment [M11]: R1 – to clarify referring to individual fathers

Comment [M12]: R2 – sentence added

Comment [M13]: R1 – reference added

1  
2  
3  
4  
5  
6  
7 order to obtain descriptions of a range of scenarios. Therefore recruitment, data  
8  
9 collection and data analysis occurred concurrently until data saturation was  
10  
11 achieved. The only inclusion criterion was that the HCP had experience of neonatal  
12  
13 resuscitation in the delivery room when the baby's father was present. No exclusion  
14  
15 criteria were identified. Participants were recruited using a range of strategies:  
16  
17 posters inviting HCPs to take part were displayed in various locations within the  
18  
19 maternity unit and NNU; HCP meetings were attended to discuss the study and  
20  
21 information leaflets were distributed in the delivery suite and NNU. Some participants  
22  
23 also recommended other HCPs. In accordance with the critical incident approach  
24  
25 (21), recruitment continued until a range of HCPs who had encountered a variety of  
26  
27 experiences was recruited (22).

28  
29  
30 Forty-nine HCPs were approached about or volunteered to take part in the study. Six  
31  
32 HCPs subsequently decided not to take part (2 midwives and 4 neonatal nurses).  
33  
34 Another six said they would participate but staff shortages and workload issues  
35  
36 meant that the interview did not take place (2 midwives, 2 neonatal nurses, 1  
37  
38 paediatrician and 1 obstetrician). The final sample consisted of 37 HCPs including  
39  
40 midwives, obstetricians, anaesthetists, neonatal nurse practitioners, neonatal nurses  
41  
42 and paediatricians. The sample included participants with diverse clinical  
43  
44 backgrounds and experience (23) (Table 1). The participants were from a range of  
45  
46 ethnic backgrounds corresponding to the main groups represented in the study site's  
47  
48 local population. Detail regarding the participants' ages and ethnicity have not been  
49  
50 included to safeguard participant anonymity. Neonatal nurses were recruited  
51  
52 because this part of the study also explored HCPs' experiences of the father's first  
53  
54 visit to his baby on the NNU (not reported here). All the neonatal nurses who  
55  
56  
57  
58  
59  
60

**Comment [M14]:** (& subsequent two comments) R1 – re: why 37 participants

**Comment [M15]:** R1 – clarification regarding number of participants approached and final number of participants

**Comment [M16]:** (& previous two comments) R1 – re: why 37 participants

**Comment [M17]:** R2 – asked for information about age and ethnicity of participants. We have reviewed the various ways this could be done but feel all would risk identification of participants – so this information has not been included as stated here

1  
2  
3  
4  
5  
6  
7 participated in this phase of the study, regularly attended delivery suite to support  
8 other staff during newborn resuscitation.  
9

## 10 INTERVIEWS

11  
12  
13  
14 Semi-structured, qualitative interviews were undertaken using Flanagan's critical  
15 incident approach (21). Participants were asked to select an incident involving  
16 newborn resuscitation in the delivery room when they and the baby's father had  
17 been present. The intention was to explore the HCP's interpretation of the father's  
18 experience. Participants described what happened and how those present,  
19 particularly the father, responded (22,24). Some chose to describe incidents that had  
20 occurred within the previous week, whilst others selected events that had occurred  
21 several months ago. The interviewer (MH) used key questions and follow-up  
22 questions to facilitate the description of events and to explore HCP perceptions and  
23 feelings. The use of the follow-up or probing questions varied according to the  
24 participant's initial response. In some instances HCPs began by talking about the  
25 mother or the parents collectively. However, subsequent probing questions  
26 encouraged them to focus their account on the father. This flexible approach  
27 enabled HCPs to describe what happened and their feelings in their own words  
28 (25,26). In order to ensure a range of scenarios were explored, participants were  
29 asked to describe two contrasting incidents (27,28). The interviews ranged between  
30 22 and 78 minutes (mean 48 minutes). Participants were interviewed in a private  
31 room within the Hospital. Most of the interviews took place on weekday afternoons  
32 within the HCP's working day. With participant informed consent, the interviews were  
33 tape-recorded to enable verbatim transcription and data analysis. Five HCPs  
34 (midwives and neonatal nurses) cried as they recalled the resuscitation and on two  
35  
36  
37  
38  
39  
40  
41  
42  
43  
44  
45  
46  
47  
48  
49  
50  
51  
52  
53  
54  
55  
56  
57  
58  
59  
60

Comment [M18]: R2 – clarification of critical incident approach used

Comment [M19]: R2 – clarifying purpose of study

Comment [M20]: R2 – clarification re: time lapse between incident and interview

Comment [M21]: R2 – explanation added re: use of probing questions.

Comment [M22]: R2 – clarification of the number of incidents described

Comment [M23]: R2 – moved from results section

1  
2  
3  
4  
5  
6 occasions, the recording was temporarily stopped. At the end of the interview, all  
7  
8 participants were given a debriefing sheet identifying possible sources of support. In  
9  
10 accordance with qualitative methods; data collection, transcription and data analysis  
11  
12 were carried out concurrently (26,29). The study was approved by the Solihull Local  
13  
14 Research Ethics Committee (05/Q2706/104). University and trust approvals were  
15  
16 also obtained. All participants gave informed consent immediately before the  
17  
18 interview.  
19

## 20 21 22 ANALYSIS

Comment [M24]: R1 and R2 – clarification re:  
data analysis process

23  
24  
25  
26 The first author transcribed the interviews and undertook preliminary data analysis.

27  
28 The transcriptions were read and reread in order to facilitate understanding.

29  
30 Thematic analysis was then undertaken whereby the first transcript was coded into

31  
32 themes. Subsequent transcripts were then analysed and additional themes or sub-

33  
34 themes were generated when the data captured something new. The software

35  
36 package 'NVivo 7' was used to facilitate this process as it enables the researcher to

37  
38 identify relationships between the themes (30). During this stage, the development of

39  
40 the thematic framework was undertaken in consultation with the second author. Data

41  
42 collection continued until no new themes were identified during data analysis (data

43  
44 saturation) (25,31). The thematic framework was then reviewed and revised by both

45  
46 authors until the final framework was agreed.  
47  
48  
49  
50  
51  
52  
53  
54  
55  
56  
57  
58  
59  
60

## RESULTS

Analysis of the data generated four themes, each of which contained subthemes: 'whose role?' 'saying and doing,' 'teamwork' and 'impact on me.' These themes are described and illustrated with a direct quotation that represents the participants' responses. Whilst the focus of the study was the experiences of fathers, a range of quotes have been utilised to demonstrate the extent to which participants also referred to the parents or the mother.

**Comment [M25]:** R2 – acknowledgement of sub-themes. Number deliberately not stated

**Comment [M26]:** R2 – the quotes used throughout are representative of the responses of participants in relation to that particular theme

**Comment [M27]:** R2- clarification re: fathers / parents / mothers

### Whose role?

This theme focuses on whose role it was to support the father during and after the resuscitation. In the events described no-one exclusively took on these roles and no-one was delegated to do so. This was because HCP attention was focused on delivering care to the mother and/or baby (Table 2 – 2.1). Whilst representatives of all HCP groups felt the midwife was the most appropriate person to support and communicate with the father, they acknowledged that she had other responsibilities at the time (Table 2 – 2.2). Verbal communication with the parents during the resuscitation was in most cases directed towards the mother. Participants thought this was appropriate because unlike the father, most mothers could not see what was happening. In addition, HCPs believed that fathers could hear what was being said. Consequently fathers received limited direct information and support and this was generally only given on an 'ad hoc' basis.

**Comment [M28]:** R2 – explanation of theme

**Comment [M29]:** R2 - clarification

**Comment [M30]:** R2 - added

**Comment [M31]:** R2 – re: number of occasions communication directed to mother

1  
2  
3  
4  
5  
6  
7 Any information that was given to fathers during the resuscitation was usually  
8 provided by an anaesthetist or midwife. This was most commonly general  
9 information because they did not feel it was their responsibility to give more detail at  
10 this time. On occasions when the resuscitation was prolonged neonatal nurses  
11 sometimes described going over to the parents / mother to explain what was  
12 happening when the baby's condition had been stabilised (Table 2 – 2.3). Once  
13 resuscitation was completed some babies required NNU admission whilst others  
14 remained with their parents. Paediatricians, neonatal nurse practitioners and  
15 neonatal nurses described speaking to the parents at this time. However, midwives  
16 also recalled advocating for parents by prompting paediatricians to speak to parents  
17 before they left the delivery room.  
18  
19  
20  
21  
22  
23  
24  
25  
26  
27

Comment [M32]: R2 – clarification re: quote used

28  
29  
30 All HCP groups discussed whether they debriefed the fathers after the resuscitation.  
31 Most midwives described attempting to speak to the father by himself to explain what  
32 had happened and correct misunderstandings. However, in many instances this was  
33 not possible because of other demands or lack of opportunity. Anaesthetists and  
34 obstetricians did not feel it was part of their role to debrief fathers and although  
35 paediatricians, neonatal nurse practitioners and neonatal nurses recalled instances  
36 when they had done this, the discussion was usually initiated by the father days or  
37 weeks later, when the baby was being cared for in the NNU. Many of the  
38 participants were reluctant to get involved in these discussions particularly neonatal  
39 nurses who had been present during the resuscitation (Table 2 – 2.4). They felt  
40 uncomfortable discussing events particularly if they thought the father would become  
41 distressed. They were also concerned about being asked questions they could not  
42 answer.  
43  
44  
45  
46  
47  
48  
49  
50  
51  
52  
53  
54  
55  
56  
57  
58  
59  
60

Comment [M33]: R2 - added

Comment [M34]: R2 – clarification re: reluctance to debrief fathers



1  
2  
3  
4  
5  
6  
7 Almost all participants were aware that other specialties have implemented WR  
8 strategies to support relatives who are present during the resuscitation of a family  
9 member. Whilst participants felt that these strategies would be of benefit to fathers,  
10 they felt these were unlikely to be implemented due to staff shortages and a lack of  
11 resources (Table 2 – 2.5).  
12  
13  
14  
15  
16  
17

Comment [M35]: R2 – paragraph and new quote added to support issue raised in discussion

### 18 Saying and doing

Comment [M36]: R2 – clarification re: theme

19  
20 This theme focuses on the HCPs' reflection on factors that influenced what they said  
21 to fathers and the ways they supported them during and after the resuscitation.  
22  
23

24 Anaesthetists and midwives acknowledged that they usually only gave fathers  
25 general information during the resuscitation because they were uncertain what was  
26 happening or how the baby was responding. However, they tried to say something  
27 positive such as commenting on the amount or colour of the baby's hair.  
28  
29  
30  
31

32  
33 When paediatricians, neonatal nurse practitioners and neonatal nurses spoke to  
34 parents after the resuscitation the information given varied, ranging from detailed  
35 information to a more general summary of events. Needing to get the baby to the  
36 NNU as quickly as possible appeared to influence the nature and extent of  
37 information given. Consequently parents whose baby required more extensive  
38 resuscitation were often given the least amount of information.  
39  
40  
41  
42  
43  
44  
45

46  
47 Being able to draw on previous experience and background knowledge was felt to be  
48 invaluable. However, most participants had not received any education or training  
49 about communicating with fathers, either generally or in specific situations such as  
50 newborn resuscitation. HCPs in senior posts also said they did not address these  
51  
52  
53  
54

Comment [M37]: R2 – clarification re: senior HCPs

1  
2  
3  
4  
5  
6  
7 **issues when teaching juniors** (Table 3 – 3.1). Midwives who had trained more  
8 recently had received some teaching about supporting fathers in general, but this  
9 was minimal. All HCPs felt their way of supporting and communicating with fathers  
10 had evolved through experience. Some midwives and anaesthetists felt they had  
11 become skilled at observing non-verbal cues portrayed by fathers and this enabled  
12 them to support them more effectively. Other HCPs drew on experience in related  
13 specialties, taking personal responsibility for their own learning, discussions with  
14 fathers and reflection on their practice (Table 3 – 3.2).

15  
16  
17  
18  
19  
20  
21  
22  
23  
24 In developing their ways of supporting and communicating with fathers, HCPs said  
25 they drew on two other elements: observing the practice of others and thinking about  
26 how they would like to be treated. They described learning from mentors, senior  
27 colleagues, their peers or junior staff, and recalled both positive and negative  
28 scenarios (Table 3 – 3.3). Obstetricians often specifically mentioned learning good  
29 practice from midwives. Several HCPs used the phrase “putting yourself in their  
30 shoes.” Female HCPs modified this approach to thinking about how they would like  
31 their partner to be treated (Table 3 – 3.4). Despite the various strategies developed  
32 over time all HCP groups said they often did not know what to say to fathers during  
33 prolonged episodes of resuscitation (Table 3 – 3.5).

#### 34 35 36 37 38 39 40 41 42 43 44 **Teamwork**

45  
46  
47 **When thinking about factors that may have impacted on the father’s, participants**  
48 **identified the importance of effective teamwork and inter-professional working during**  
49 **the resuscitation.** They felt that when the team worked well together, the situation  
50 was usually dealt with quickly and smoothly to the benefit of all concerned, including  
51  
52  
53  
54  
55  
56  
57  
58  
59  
60

Comment [M38]: R2 – clarification re: theme

1  
2  
3  
4  
5  
6  
7 the father. Senior HCPs described having an 'instinctive' way of working with their  
8 colleagues such that verbal communication was not required. They described  
9 scenarios when those present spontaneously took on different roles and  
10 responsibilities assisting and supporting each other (Table 4 – 4.1). **Obstetricians**  
11 **and anaesthetists recalled distracting the father so that he could not see what was**  
12 **happening and to reduce the risk of him hindering the resuscitation in any way. This**  
13 **approach enabled their colleagues to focus on the resuscitation and none of the**  
14 **fathers intervened with the resuscitation in the incidents described.** Anaesthetists  
15 also described assisting with the resuscitation, particularly when a junior  
16 paediatrician was having difficulty intubating the baby. Several midwives described  
17 responding to a crash call. They often took on the role of 'go-between,' relaying  
18 information between the neonatal and obstetric teams and the parents. The  
19 importance of senior HCPs supporting junior staff was also identified (Table 4 – 4.2).

### 32 33 **Impact on me**

34  
35  
36  
37 **Whilst the intention of this study was to explore the HCP's interpretation of the**  
38 **father's experience, the HCPs frequently reflected on the impact of the events they**  
39 **described on themselves.** During the resuscitation, HCPs described trying to adopt a  
40 calm and self-assured manner regardless of how they were feeling. They hoped this  
41 attitude would be transmitted to the father and as a consequence, he would be  
42 comforted and reassured. Many midwives however, said it was difficult to adopt this  
43 approach and when recounting specific events described them as being "awful",  
44 "horrendous", "terrible" and "shocking." In a less extreme way, when they reflected  
45  
46  
47  
48  
49  
50  
51  
52  
53  
54  
55  
56  
57  
58  
59  
60

**Comment [M39]:** R2 – explanation re: distraction

**Comment [M40]:** R2 – explanation re: theme

1  
2  
3  
4  
5  
6  
7 on specific events, several midwives felt they should have done more to support the  
8 father (Table 5 – 5.1).  
9

10  
11  
12 Another issue some paediatricians and the neonatal nurse practitioners talked about  
13 was when the father approached the resuscitator during the resuscitation. The  
14 neonatal nurse practitioners and some of the more senior paediatricians were  
15 comfortable with this and felt it did not impact on their practice in a negative way  
16 (Table 5 – 5.2). Others however, felt uneasy being watched so closely and felt it  
17 placed additional stress on them in an already pressurised situation (Table 5 – 5.3).  
18  
19  
20  
21  
22  
23  
24  
25

26 The HCPs rarely said the events they described had a positive impact on them. Their  
27 relief and satisfaction when all was well was usually implied rather than stated. This  
28 may be because in many cases, the busy nature of the care setting meant that they  
29 often quickly became involved in the care of other parents and babies with limited  
30 opportunity to reflect on what had happened. Midwives were the only HCPs who  
31 described becoming emotional when the resuscitation was successful. This is  
32 probably because in most cases they had been directly involved in the couple's care  
33 during labour.  
34  
35  
36  
37  
38  
39  
40  
41  
42

## 43 **DISCUSSION**

44  
45  
46 This is the first known reported study to explore the experiences and perceptions of  
47 HCPs involved in neonatal resuscitation in the delivery room when the baby's father  
48 was present. The interviews provide strong evidence of HCPs' perspectives of this  
49 type of scenario. Although all HCP groups said the fathers needed support and  
50  
51  
52  
53  
54  
55  
56  
57  
58  
59  
60

1  
2  
3  
4  
5  
6  
7 information during the resuscitation, it was acknowledged these needs were almost  
8 always unmet. This confirms a finding from an earlier phase of the broader study  
9  
10 (12). HCPs felt this was because their priorities at the time were the health of the  
11 baby or the mother. A view also shared by fathers in an earlier phase of this study  
12  
13 (12). Although HCPs thought the midwife was probably best placed to support the  
14 father it was acknowledged that that she had a duty of care to the mother and was  
15  
16 often involved in her ongoing care. A key factor in the failure to meet the needs of  
17  
18 fathers appeared to be that none of the professional groups involved had direct  
19  
20 responsibility to support and communicate with him. It was frequently stated that “he  
21  
22 wasn’t my patient” or “that’s not part of my role.”  
23  
24  
25  
26  
27

28 Most HCPs were aware that in other care settings a designated HCP often supports  
29  
30 relatives when they witness resuscitation events (14,32,33). The role of the  
31  
32 chaperone is to explain what is happening and to support, reassure, and de-brief the  
33  
34 relative. They can also intervene if the relative’s behaviour becomes distracting  
35  
36 (20,32). This role is generally undertaken by a senior HCP, usually a nurse, who can  
37  
38 provide appropriate information and support (32). Whilst the HCPs suggested a  
39  
40 chaperone would be beneficial for fathers, it was felt staff shortages and lack of  
41  
42 resources would prevent this from happening.  
43  
44

45 The HCPs identified a number of factors that could have added to what would have  
46  
47 already been a difficult experience for fathers. These factors included a lack of direct  
48  
49 information at key points and situations where fathers were excluded or  
50  
51 marginalised. Many HCPs also described the impact of events on them and aspects  
52  
53 they found difficult. An issue that frequently occurred was what to say during  
54  
55  
56  
57  
58  
59  
60

**Comment [M41]:** R2 – clarification regarding previous publication. This was in relation to the first phase of the study which involved interviews with fathers

1  
2  
3  
4  
5  
6  
7 prolonged resuscitation. Experienced HCPs as well as those who had been working  
8 in the specialty for a short time identified this difficulty. The more acute distress  
9 displayed by midwives and neonatal nurses during the interviews was most  
10 commonly because they felt the situation was not handled well and they felt culpable  
11 to some extent. Obstetricians, anaesthetists and paediatricians were more 'matter-  
12 of-fact' about what happened and did not appear to feel responsible when a father's  
13 needs were not met. However, paediatricians described their discomfort when  
14 fathers came to the resuscitaire. This may indicate a lack of confidence in their ability  
15 or their recognition that the presence of the father can cause additional pressure at  
16 an already stressful time. This was explored in the early literature regarding WR in  
17 other care settings such as adult and paediatric intensive care and accident and  
18 emergency departments which reports that HCPs felt WR would have a negative  
19 impact on them (14,17,18). However, over time HCPs who have been exposed to  
20 WR have found ways to accommodate it in their practice.  
21  
22  
23  
24  
25  
26  
27  
28  
29  
30  
31  
32  
33  
34  
35  
36  
37  
38  
39  
40  
41  
42  
43  
44  
45  
46  
47  
48  
49  
50

51  
52  
53  
54  
55  
56  
57  
58  
59  
60

Guidance about supporting parents in the delivery room is given in the recently updated European and UK newborn life-support training programmes, mainly in relation to communicating with parents before, during and after the event (34,35). However, no specific guidance is given about ways to communicate with or ways to support the father. This would appear to be an area worthy of development given the lack of confidence that some HCPs expressed about communicating with fathers during resuscitation events, particularly when the resuscitation was prolonged.

## STRENGTHS AND LIMITATIONS

The study's strengths and limitations are acknowledged:

Comment [M42]: R2 – clarification re: care settings

Comment [M43]: Section amended in response to R1 comments. Bullet points added and limitations acknowledged

- 1  
2  
3  
4  
5  
6  
7  
8  
9 • The critical incident approach was generally an appropriate way to explore  
10 HCPs' experiences of specific events. This approach enabled many of them  
11 to consider the impact of newborn resuscitation on fathers for the first time.  
12  
13  
14 • Some participants found focusing on issues pertaining to the father more  
15 difficult and sometimes talked about the mother or the parents collectively.  
16 However, subsequent probing questions encouraged them to concentrate on  
17 the father.  
18  
19  
20  
21  
22 • Some participants chose to describe events that occurred a while ago. It is  
23 therefore difficult to determine the extent to which recall bias influenced their  
24 descriptions. However, they appeared to have no difficulty remembering their  
25 feelings or what happened. They were often surprised at how clearly they  
26 could recall the event.  
27  
28  
29  
30  
31  
32 • Incidents where the baby did not survive were not described. HCPs may have  
33 thought the researchers were only interested in events where the baby  
34 survived, although this was not stated by the interviewer. Alternatively, they  
35 may have deliberately elected not to recall an incident that they thought might  
36 be too sensitive or potentially controversial to discuss.  
37  
38  
39  
40  
41  
42 • Whilst the preliminary data analysis was undertaken by the first author, the  
43 thematic framework was discussed with the second author as it was  
44 developed and the final framework was agreed by both authors.  
45  
46  
47

48  
49 Although undertaken in one setting, the findings from this independent study provide  
50 insight to the experiences and perceptions of HCPs and the context in which the  
51 resuscitation events occurred (25). Given the qualitative nature of this study, it is  
52  
53  
54

Comment [M44]: R1 – potential recall bias acknowledged

Comment [M45]: R1 – clarification re: data analysis process

Comment [M46]: R1 – clarification re: potential transferability of findings

1  
2  
3  
4  
5  
6 inappropriate to generalize the findings to the wider population. However, in  
7  
8 accordance with the notion of transferability, the findings of this study have  
9  
10 highlighted issues that may be of relevance in other settings (23). To gain a broader  
11  
12 view of HCPs' experiences and the longer term impact, this study could be replicated  
13  
14 with larger groups of HCPs. It would also be valuable to explore the experiences of  
15  
16 HCPs where the baby did not survive the resuscitation. Although such a study would  
17  
18 present challenges, it would have the potential to provide insight to situations that  
19  
20 could have profound and possibly long lasting effects on HCPs. This in turn could  
21  
22 influence the provision of HCP education, training and support in the future.  
23  
24

## 25 26 **IMPLICATIONS FOR PRACTICE**

27  
28  
29 To some extent newborn resuscitation is part of the normal working day for many  
30  
31 HCPs involved in perinatal care. However, some midwives and neonatal nurses  
32  
33 became distressed when discussing events some of which occurred some time ago  
34  
35 and yet remained a strong memory. This suggests there is a need for greater  
36  
37 recognition of the impact of resuscitation events on HCPs. The provision of  
38  
39 opportunities for formal and informal reflection on practice, debriefing and support  
40  
41 could be more extensive.  
42  
43  
44

45 The HCPs were generally aware of the needs of fathers during and after newborn  
46  
47 resuscitation. However, a number of difficulties and challenges affected how they  
48  
49 supported and communicated with fathers. Whilst there is increasing evidence  
50  
51 pertaining to the needs of fathers, in maternity care, HCPs generally focus on the  
52  
53 needs of mothers and babies (36); duty of care and professional responsibilities  
54  
55  
56  
57  
58  
59  
60



1  
2  
3  
4  
5  
6  
7 determine this. Nevertheless, it would appear that there is scope for much more  
8 extensive HCP education and training about supporting and communicating with  
9 fathers around the time of newborn resuscitation. The allocation of resources to  
10 support the provision of a chaperone for fathers during resuscitation would also be  
11 worthy of consideration by service providers (14,20).  
12  
13  
14  
15  
16

## 17 18 **ACKNOWLEDGEMENTS**

19  
20  
21 We would like to thank the health care professionals who participated in this study  
22 and were willing to share their experiences so readily.  
23  
24  
25  
26

## 27 28 **COMPETING INTERESTS**

29  
30  
31 Both authors have completed the Unified Competing Interest form at  
32 [http://www.icmje.org/coi\\_disclosure.pdf](http://www.icmje.org/coi_disclosure.pdf) (available on request from the corresponding  
33 author) and declare: no support from any organisation for the submitted work; no  
34 financial relationships with any organisations that might have an interest in the  
35 submitted work in the previous three years, no other relationships or activities that  
36 could appear to have influenced the submitted work.  
37  
38  
39  
40  
41  
42  
43

## 44 45 **DATA SHARING**

46  
47  
48 **No additional data available.**  
49  
50  
51  
52  
53  
54  
55  
56  
57  
58  
59  
60

## FUNDING

Development and approval of the study, participant recruitment, data collection and initial data analysis were undertaken when the first author held the Bliss Neonatal Nurse Research Fellow post at the National Perinatal Epidemiology Unit, University of Oxford. The first author's PhD fees were met by Birmingham City University and the first author. All other expenses were met by the first author. Aston University was the sponsor. This included providing University approval for the study and ensuring the study was carried out in accordance with the Research Governance Framework.

## AUTHORS' CONTRIBUTIONS

Dr M.E Harvey (MH) developed and designed the research proposal, negotiated access to the study-site, obtained the required approvals, recruited participants, conducted the interviews, undertook the data analysis and wrote the first draft of this paper. Professor HM Pattison (HP) supervised MH throughout the study, reviewed and agreed the coding framework, contributed to and has agreed the final version of the paper. MH is the guarantor.

The Corresponding Author has the right to grant on behalf of all authors and does grant on behalf of all authors, an exclusive licence on a worldwide basis to the BMJ Publishing Group Ltd and its Licensees to permit this article (if accepted) to be published in BMJ editions and any other BMJ PGL products and sub-licences to exploit all subsidiary rights, as set out in our licence.

## REFERENCES

Comment [M47]: First 6 references added to support amended introduction

1. World Health Organization. *Fatherhood and Health Outcomes in Europe*. World Health Organization: Copenhagen 2007
2. Klaus MH, Kennell JH. *Parent-Infant Bonding*. Second edition. CV Mosby: St. Louis MO 1982
3. Ramchandani P, Stein A, Evans J, O'Connor TG and the ALSPAC study team. Paternal depression in the postnatal period and child development: a prospective population study *Lancet*. 2005;365:2201-2205
4. Department of Health, Department for Education and Skills. *National Service Framework for children, young people and maternity services – Maternity* London: Department of Health 2004
5. Burgess A. *Maternal and infant health in the perinatal period: the father's role* The Fatherhood Institute: Abergavenny 2008
6. Shribman S. *Making it Better: For Mother and Baby* Department of Health: London 2007
7. Kiernan K, Smith K. Unmarried Parenthood: New Insights from the Millennium Cohort Study. *Popul Trends*. 2003;26-33
8. TNS System Three. *NHS Maternity Services Quantitative Research*. Edinburgh: TNS System Three 2005;44-57

- 1  
2  
3  
4  
5  
6  
7 9. Murthy V, Rao N, Fox GF, Milner AD, Campbell M, Greenough A. Survey of  
8 UK newborn resuscitation practices. *Arch Dis Child Fetal Neonatal Ed.*  
9 2012;97:F154-5  
10  
11  
12  
13  
14 10. Fulbrook P, Latour JM, Albarra, JW. Paediatric critical care nurses' attitudes  
15 and experiences of parental presence during cardiorespiratory resuscitation:  
16 A European survey. *Int J Nurs Stud.* 2007;44:1238-1249  
17  
18  
19  
20  
21  
22 11. Perry SE. Support for parents witnessing resuscitation: nurse perspectives.  
23 *Paed Nurs.* 2009;21:26-31  
24  
25  
26  
27  
28 12. Harvey ME, Pattison HM, Being there: a qualitative interview study with  
29 fathers present during the resuscitation of their baby at delivery. *Arch Dis*  
30 *Child Fetal Neonatal Ed.* 2012;97:F439-F443  
31  
32  
33  
34  
35  
36 13. Sacchetti A, Carraccio C, Leva E, Harris RH, Lichenstein R. Acceptance of  
37 family member presence during pediatric resuscitations in the emergency  
38 department: Effects of personal experience. *Pediatr Emerg Care.* 2000;  
39 16:85-87  
40  
41  
42  
43  
44  
45 14. Grice AS, Picton P, Deakin CDS. Study examining attitudes of staff,  
46 paediatrics and relatives to witnessed resuscitation in adult intensive care  
47 units. *Br J Anaesth.* 2003;91:820-824  
48  
49  
50  
51  
52  
53  
54  
55  
56  
57  
58  
59  
60

- 1  
2  
3  
4  
5  
6  
7 15. Fulbrook P, Albarran JW, Latour JM. A European survey of critical care  
8 nurses' attitudes and experiences of having family members present during  
9 cardiorespiratory resuscitation *Int J Nurs Stud.* 2005;42:557-568  
10  
11  
12  
13  
14 16. McGahey PR. Family presence during pediatric resuscitation: focus on staff  
15 *Critic Care Nurs.* 2002;22:29-34  
16  
17  
18  
19  
20 17. Schilling RJ. Should relatives watch resuscitation? – No room for spectators  
21 *BMJ.* 1994;309:406  
22  
23  
24  
25  
26 18. MacLean SL, Guzzetta CE, White C, Fontaine D, Eichhorn DJ, Meyers TA et  
27 al. Family presence during cardiopulmonary resuscitation and invasive  
28 procedures: practices of critical care and emergency nurses *Am J Crit Care.*  
29 2003;12:246- 257  
30  
31  
32  
33  
34  
35 19. American Academy of Pediatrics. Family-Centred Care and the Pediatricians  
36 Role *Pediatrics.* 2003;112:691-696  
37  
38  
39  
40  
41 20. Baskett PJF, Steen PA, Bossaert L. European Resuscitation Council  
42 Guidelines for Resuscitation 2005 - Section 8. The ethics of resuscitation and  
43 end-of-life decisions *Resuscitation.* 2005;67:S171-S180  
44  
45  
46  
47  
48 21. Flanagan JC. The critical interview technique *Psychology Bulletin.*  
49 1954;51:327-358  
50  
51  
52  
53  
54  
55  
56  
57  
58  
59  
60

- 1  
2  
3  
4  
5  
6  
7 22. Broström A, Strömberg A, Dahlström U, Fridlund B. Congestive heart failure,  
8 spouses' support and the couple's sleep situation: a critical incident technique  
9 analysis *J Clin Nurs*. 2003;12: 223-233  
10  
11  
12  
13  
14 23. O'Leary Z. *The Essential Guide to Doing Research*. London: Sage  
15 Publications 2004  
16  
17  
18  
19  
20 24. Sharoff L. Critique of the critical incident technique *J Res Nurs*. 2008;13:301-  
21 309  
22  
23  
24  
25  
26 25. Pope C, Campbell R. Qualitative research in obstetrics and gynaecology. *Brit*  
27 *J Obstet Gynaec*. 2001;108:233-237  
28  
29  
30  
31 26. Kvale S, Brinkmann S. *Interviews: Learning the Craft of Qualitative Research*  
32 *Interviewing*. Second edition. Los Angeles: Sage 2009  
33  
34  
35  
36  
37  
38 27. Robson C. *Real world research*. Third edition. Oxford: Blackwell Publishing  
39 2012  
40  
41  
42  
43  
44 28. Silvester J. Work and Organizational Psychology in Willig C, Stainton-Rogers  
45 *W. The Sage Handbook of Qualitative Research in Psychology*. London:  
46 Sage Publications 2008  
47  
48  
49  
50 29. Pope C, Ziebland S, Mays N. Analysing qualitative data. *BMJ*. 2000;320:114-  
51 116  
52  
53  
54  
55  
56  
57  
58  
59  
60

- 1  
2  
3  
4  
5  
6  
7 30. Lewins A, Silver C. *Using software in qualitative research*. London: Sage  
8 Publications 2007  
9  
10  
11  
12 31. Malterud K. Qualitative research: standards, challenges and guidelines.  
13  
14 *Lancet*. 2001;358:483-488  
15  
16  
17  
18 32. Goldstein A, Berry K, Callaghan A. Resuscitation witnessed by relatives has  
19  
20 proved acceptable to doctors in paediatric cases. *BMJ*. 1997;314:144-145  
21  
22  
23  
24 33. Robinson SM, Mackenzie-Ross S, Campbell Hewson GL, Egleston CV,  
25  
26 Prevost AT. Psychological effect of witnessed resuscitation on bereaved  
27  
28 relatives. *Lancet*. 1998;352:614-617  
29  
30  
31  
32 34. Nolan JP, Soar J, Zideman DA, *et al* European Resuscitation Council  
33  
34 Guidelines for Resuscitation 2010 Section 1. Executive summary.  
35  
36 *Resuscitation*. 2010;81:1219-1276  
37  
38  
39 35. Resuscitation Council. *Resuscitation at birth*. Third edition. London:  
40  
41 Resuscitation Council (UK) 2011  
42  
43  
44  
45 36. McVeigh CA, Baafi M, Williamson M. Functional status after fatherhood: An  
46  
47 Australian study. *J Obstet Gynecol Neonatal Nurs*. 2002;31:165-171  
48  
49  
50  
51  
52  
53  
54  
55  
56  
57  
58  
59  
60

| HCP Group                    | No. | Sex                | Time from initial qualification | Length of time in current post |
|------------------------------|-----|--------------------|---------------------------------|--------------------------------|
| Midwives                     | 12  | Female*            | 1 – 29 years                    | 6 months – 5 years             |
| Neonatal nurses              | 10  | Female*            | 2 – 32 years                    | 6 months – 23 years            |
| Neonatal nurse practitioners | 2   | Female*            | 7 – 19 years                    | 6 months – 7 years             |
| Obstetricians                | 3   | Female             | 9 – 22 years                    | 1 – 6 years                    |
| Anaesthetists                | 4   | 2 Female<br>2 Male | 6 – 16 years                    | 1 – 6 years                    |
| Paediatrician                | 6   | 1 Female<br>5 male | 2 – 33 years                    | 2½ months – 18 years           |

\*No males were employed in this role during the period of recruitment

Table 1 Participant biographical details



**Table 2** Whose role?

|     |                                                                                                                                                                                                                                                                                                      |
|-----|------------------------------------------------------------------------------------------------------------------------------------------------------------------------------------------------------------------------------------------------------------------------------------------------------|
| 2.1 | <i>"My main focus is the mother. I think that's, I think it's important to understand that because the mother's my patient, the father's not my patient."</i> (Anaesthetist14)                                                                                                                       |
| 2.2 | <i>"When the baby was born and she needed resuscitating, he ran out the room crying. I felt like I should have ran after him really which I couldn't at the time because I was trying to like stop her ((the mother)) from bleeding. So it was difficult but I did think, oh my God."</i> (Midwife9) |
| 2.3 | <i>"I at that time, I could not speak to dad because we, our priority was the baby and baby needed intubating. Once that was done I was able to then go and speak to mum just to give her brief information of what was going on, how the baby was."</i> (NeonatalNurse1)                            |
| 2.4 | <i>"It's not my place, just in case he asked me sensitive questions that I'm not able to answer. It's very difficult in that situation especially if you've got a very sick baby. I would not take part in that at all."</i> (NeonatalNurse5)                                                        |
| 2.5 | <i>"There's no-one specifically to do that, unless we employed an extra member of staff just to look after the father, but we can't do that."</i> (Anaesthetist13)                                                                                                                                   |

**Comment [M48]:** Added to support additional material in relation to this theme

---

**Table 3**      **Saying and doing**

---

- 3.1      *"I don't think it's anything that anybody's spoken about and I suppose I don't really speak to the trainees who come through about it either."*  
(Paediatrician16)
- 3.2      *"I think my practice is probably based on what I've heard husbands and partners tell me and how they felt."* (Midwife15)
- 3.3      *"I have a series of horror stories of observing my consultant teachers in days of yore making a complete and utter hash of it. And I use that you know and I just, you just learn by thinking, right, if I live a thousand years, I will never do that."* (Paediatrician15)
- 3.4      *"I always say, speak to people how you would want to be spoken to. Treat them the way you want to be treated and just put yourself in their situation. You know, it's your partner, that's your baby and somebody's not even acknowledging that you're there, how would that make you feel?"* (Obstetrician61)
- 3.5      *"It was awful. No-one was saying anything and mum was crying. I was just thinking please, please somebody say something."*  
(NeonatalNurse7)
-

1  
2  
3  
4  
5  
6  
7  
8  
9  
10  
11  
12  
13  
14  
15  
16  
17  
18  
19  
20  
21  
22  
23  
24  
25  
26  
27  
28  
29  
30  
31  
32  
33  
34  
35  
36  
37  
38  
39  
40  
41  
42  
43  
44  
45  
46  
47  
48  
49  
50  
51  
52  
53  
54  
55  
56  
57  
58  
59  
60

---

**Table 4**      **Teamwork**

---

- 4.1      *"If I'm happy the mother's suturing is done and mum's not bleeding, mum's fine and everybody is working on the baby then I will stay and do whatever I can whether it's fetching for the paediatrician or whether it's staying and supporting mum and dad because the midwife's helping the paediatrician."* (Obstetrician10)
- 4.2      *"It's like yesterday the shoulder dystocia, the baby needed to be resuscitated. Me and the Shift Leader talked about it, like you know, you go over it like, oh that was awful and, oh he ((the father)) was crying, oh it was terrible and you just talk about it and then that helps you to kind of deal with what's happened."* (Midwife9)
-

---

**Table 5**      **Impact on me**

---

- 5.1      *"You try and support the fathers and meet their needs when it happens. I do have days where I go home deflated thinking I really wish I could have done more for him that day."* (Midwife12)
- 5.2      *"I don't mind it at all. I'm used to people watching what I do and I think he needs to see anyway."* (NeonatalNursePractitioner14)
- 5.3      *"I don't like it. Not because it's a worry to me it's just because I don't happen to like being watched when I'm working."* (Paediatrician7)
- 5.4      *"Yes. Even now, after all this time, there are some difficult deliveries and you want to, you share in all of that emotion and it's very easy to kind of get prickly eyes when the baby is ok."* (Midwife7)
-

1  
2  
3  
4  
5 Interview schedule  
6

7 Opening statement: **This interview forms part of a larger study that aims to gain an**  
8 **understanding of the experiences and perceptions of fathers who attend the birth of**  
9 **their baby, especially when the baby has required resuscitation at birth and / or**  
10 **admission to a neonatal unit.**

11  
12 **Within this interview I am particularly interested in your experience of situations when**  
13 **a sick / preterm baby is delivered, requires resuscitation at birth and / or admission to**  
14 **a neonatal unit, and the baby's father is present. Before consideration of key issues,**  
15 **can I clarify the following?**  
16

17  
18 **Job title / Qualifications / Length of time qualified / Length of time this post**  
19

20 KEY ISSUES TO EXPLORE  
21

22 **There are a variety of situations that you might have experienced:**  
23

- 24 **▪ The antenatal preparation of fathers (i.e. before labour has started) particularly**  
25 **if the birth of a sick / preterm baby is anticipated.**
- 26 **▪ Being at the delivery of a sick / preterm baby when the baby's father is also**  
27 **present.**
- 28 **▪ Being at the resuscitation of a newborn baby when the baby's father is also**  
29 **present.**
- 30 **▪ Being present when a baby is admitted to the neonatal unit when the baby's**  
31 **father is also present.**  
32

33  
34 **Which of the above do you have experience of?**  
35

36 **When was the last time that you encountered each situation?**  
37

38 *(check each individual situation)*  
39

40 **So, for the purpose of this interview we'll be talking about you .....**

- 41 **▪ *Being involved in the antenatal preparation of fathers (i.e. before labour has started)***  
42 ***particularly if the birth of a sick / preterm baby is anticipated.***
- 43 **▪ *Being at the delivery of a sick / preterm baby when the baby's father is also present.***
- 44 **▪ *Being at the resuscitation of a newborn baby when the baby's father is also present.***
- 45 **▪ *Being present when a baby is admitted to the neonatal unit when the baby's father is***  
46 ***also present.***  
47

48 **Can you recall an occasion you were involved with relating to .....**  
49

50 *Follow up any specific information to clarify description of events.*

51 *Clarify participant's role in the situation – what did you do / say?*

52 *Why does this case particularly spring to mind?*  
53

54 **Is there anything that you'd like to add, particularly regarding what happened to the**  
55 **father?**

56 *Follow up any specific information to clarify description of events.*

57 *Clarify participant's role in the situation – what did you do / say?*

58 *Do you know if the father wanted to be there?*  
59

60 **Thinking back to that occasion, do you think that the situation went well or not as well**  
**as it could have done?**

1  
2  
3  
4  
5  
6  
7  
8  
9  
10  
11  
12  
13  
14  
15  
16  
17  
18  
19  
20  
21  
22  
23  
24  
25  
26  
27  
28  
29  
30  
31  
32  
33  
34  
35  
36  
37  
38  
39  
40  
41  
42  
43  
44  
45  
46  
47  
48  
49  
50  
51  
52  
53  
54  
55  
56  
57  
58  
59  
60

*Why do you think this was the case?*

**What about the father in this case? – looking at it from his perspective – did it go well or not as well as it could have done?**

*Why do you think this was the case?*

**Can you recall a contrasting situation you were involved with, by that I mean one that didn't / did go well?– can you tell me about that?**

*Follow up any specific information to clarify description of events.*

*Clarify details / participant's role in the situation – what did you do / say?*

*What do you think were the key issues that made this situation different to the previous case?*

*Why does this case particularly spring to mind?*

**Is there anything that you'd like to add, particularly regarding what happened to the father?**

*Follow up any specific information to clarify description of events.*

*Clarify participant's role in the situation – what did you do / say?*

*From his perspective do you think that he'd say it went well or not as well as it could have done?*

*Clarify participant's role in the situation – what did you do / say?*

**What do you suppose fathers feel that they need in terms of information / support antenatally / prior to the delivery / resuscitation / admission of their baby?**

*On what basis do you say this?*

*In your experience, do you think this happens in reality?*

*Why does / doesn't this happen?*

*What do think are the issues that a health care professional should consider when supporting a father at this time?*

*Do you think that different fathers have different needs? – if so – how do you determine individual needs?*

*Which health care professional group do you think has ultimate responsibility for supporting fathers at this time?*

**What do you suppose fathers feel that they need in terms of information / support during the delivery / resuscitation / admission of their baby?**

*On what basis do you say this?*

*In your experience, do you think this happens in reality?*

*Why does / doesn't this happen?*

*What do you think are the issues that a health care professional should consider when supporting a father at this time?*

*Do you think that different fathers have different needs? – if so – how do you determine individual needs?*

*How do you determine if the father wants to be there?*

*Which health care professional group do you think has ultimate responsibility for supporting fathers at this time?*

**What do you suppose fathers feel that they need in terms of information / support after the delivery / resuscitation / admission of their baby?**

*On what basis do you say this?*

*What impact do you think being present at..... has on fathers?*

*In your experience, do you think this happens in reality?*

*Why does / doesn't this happen?*

*What do you think are the issues that a health care professional should consider when supporting a father at this time?*

1  
2  
3 Do you think that different fathers have different needs? – if so – how do you determine  
4 individual needs?

5 Which health care professional group do you think has ultimate responsibility for supporting  
6 fathers at this time?  
7

8  
9 **Can you tell me about the nature / extent of any educational preparation you've  
10 received regarding the provision of support specifically for fathers during delivery /  
11 resuscitation / admission to the neonatal unit?**

12 Clarify details.

13 Have you participated in 'mock' incidents? For example: labour ward drill?).

14 Was it father / mother / parent focused?

15 Has this been adequate?

16 If no how do you now know what to do / say in these situations? What additional educational  
17 preparation do you feel you need?

18 Apart from more formal educational preparation, how else have you learned what to do / say  
19 in these situations?  
20

21  
22 **We've talked quite a lot about the health care professional role when supporting  
23 fathers – I'd like now to ask you to think about the impact that carrying out this role  
24 has on you – can you tell me about that?**

25 Positive / negative impact – particularly re: helping / supporting fathers.

26 Short & long-term effects.

27 Is this always the case or just sometimes?

28 If sometimes – what key factors trigger this effect on you?

29 Re: negative effects – how do you deal / cope with this?

30 In these situations is there anything that fathers could do to help you?  
31

32  
33 **Do you have any suggestions about ways that hospitals / health care professionals  
34 could help fathers who experience the situations we've discussed?**

35 Follow-up any specific issues that might have been raised earlier.

36 Does the hospital have policies / procedures / guidelines re: supporting / care of fathers? – if  
37 yes – clarify details – if not – why not? – do you think that there should be policies /  
38 procedures / guidelines in place?

39 What advice would you give to another health care professional who might be about to  
40 support a father in one of these situations for the first time?  
41

42 **Are there any other issues that you would like to raise in relation to these issues?**

43  
44 **Can I end by asking some more information about yourself?**

45 Age / How would you describe your ethnicity /  
46  
47  
48

49 **Thank-you very much for your help with this part of the study.**  
50  
51  
52  
53  
54  
55  
56  
57  
58  
59  
60
